1 Oncogenic PKA signaling stabilizes MYC oncoproteins via an aurora kinase A-dependent mechanism

2  
3 **Authors:**

4 Gary K. L. Chan<sup>1,2</sup>, Samantha Maisel<sup>1,2</sup>, Yeonjoo C. Hwang<sup>1,2</sup>, Rebecca R. B. Wolber<sup>1,2</sup>, Phuong Vu<sup>3</sup>, Krushna  
5 C. Patra<sup>3</sup>, Mehdi Bouhaddou<sup>4,5</sup>, Heidi L. Kenerson<sup>6</sup>, Raymond S. Yeung<sup>6</sup>, Danielle L. Swaney<sup>4,5</sup>, Nevan J.  
6 Krogan<sup>4,5</sup>, Rigney E. Turnham<sup>1,2</sup>, John D. Scott<sup>7</sup>, Kimberly J. Riehle<sup>6</sup>, Nabeel Bardeesy<sup>3</sup>, John D. Gordan<sup>1,2</sup>

7  
8 <sup>1</sup>Division of Hematology/Oncology, Helen Diller Family Comprehensive Cancer Center, University of  
9 California, San Francisco, San Francisco, CA, USA.; <sup>2</sup>Quantitative Biosciences Institute (QBI), University of  
10 California San Francisco, San Francisco, CA, USA.

11 <sup>3</sup>Department of Medicine, Harvard Medical School, Boston, Massachusetts, USA; Massachusetts General  
12 Hospital Cancer Center, Boston, Massachusetts, USA.

13 <sup>4</sup>Department of Cellular and Molecular Pharmacology, University of California San Francisco, San  
14 Francisco, CA, USA; <sup>5</sup>David J. Gladstone Institute, San Francisco, CA, USA.

15 <sup>6</sup>Department of Surgery and Northwest Liver Research Program, University of Washington, Seattle, WA,  
16 USA.

17 <sup>7</sup>Department of Pharmacology, University of Washington Medical Center, Seattle, WA, USA.

18  
19 **Abstract:**

20 Genetic alterations that activate protein kinase A (PKA) signaling are found across many tumor types, but  
21 their downstream oncogenic mechanisms are poorly understood. We used global phosphoproteomics and  
22 kinome activity profiling to map the conserved signaling outputs driven by diverse genetic changes that  
23 activate PKA in human cancer, including melanoma and fibrolamellar carcinoma (FLC). We define two  
24 consensus networks of effectors downstream of PKA in cancer models. One is centered on RAS/MAPK  
25 components, and a second involves Aurora Kinase A (AURKA). We find that AURKA stabilizes c-MYC and  
26 n-MYC protein levels and expression programs in PKA-dependent tumor models, in part via a positive  
27 feedback loop mediated by the oncogenic kinase PIM2. This process can be suppressed by conformation-  
28 disrupting AURKA inhibitors such as CD-532. Our findings elucidate two independent mechanisms of PKA-  
29 driven tumor cell growth and offer insight into drug targets for study in FLC and other PKA-dependent  
30 malignancies.

31  
32 **Introduction**

33 Protein kinase A (PKA) is an evolutionarily conserved signaling effector with established roles in  
34 diverse physiological processes, including the regulation of growth, differentiation and metabolism  
35 (Turnham & Scott, 2016). Canonically PKA is controlled by cyclic AMP (cAMP) that are generated by the  
36 activation of the G protein-coupled receptor (GPCR) signaling. However genomic alterations in the  
37 components of the GPCR-PKA signaling pathway lead to constitutive activation of this kinase in many  
38 human diseases including cancer (Taylor et al., 2013). A variety of oncogenic events result in PKA  
39 stimulation, including ligand activation of upstream GPCRs (Coles et al., 2020; McCudden et al., 2005),  
40 point mutations in the G protein subunit *GNAS* (Iglesias-Bartolome et al., 2015; Patra et al., 2018),  
41 inactivation of PKA regulatory protein PKA-R1 $\alpha$  (Yin et al., 2011), and activating mutations in *PRKACA*,  
42 which encodes the catalytic subunit of PKA (PKAc) itself (Berthon et al., 2015). Elevated PKA activity as a  
43 consequence of *GNAS* or *PRKACA* mutations has been reported in a variety of endocrine tumors (Salpea  
44 & Stratakis, 2014), including the *PRKACA L205R* mutation in adrenocortical and ACTH-producing pituitary  
45 tumors in patients with Cushing's syndrome (Cao et al., 2014). Patients with germline inactivating  
46 mutations in *PRKAR1A* are predisposed to develop myxomas, thyroid and gonadal tumors, referred to as  
47 Carney Complex (Yin et al., 2011). Recently, a *DNAJB1-PRKACA* gene fusion has emerged as the dominant

48 oncogenic event in a rare liver tumor, fibrolamellar carcinoma (FLC) (Honeyman et al., 2014). This gene  
49 fusion has been reported in 79-100% of FLC (Cornella et al., 2015; Honeyman et al., 2014), with rare cases  
50 instead bearing *PRKAR1A* deletion (Graham et al., 2018). *DNAJB1-PRKACA* fusions have also been  
51 described in very small subsets of hepatocellular carcinoma (HCC) (Cancer Genome Atlas Research  
52 Network., 2017), cholangiocarcinoma (Nakamura et al., 2015), and oncocytic biliary tumors (Singhi et al.,  
53 2020).

54 The PKA holoenzyme is composed of two catalytic (C) and two regulatory (R) subunits; its  
55 activation is regulated by the second messenger cAMP (Taylor et al., 2013). In its inactive state, R subunits  
56 form a homodimer that binds and inhibits the C subunits. cAMP generated by GPCR/GNAS-mediated  
57 stimulation of adenylyl cyclase binds R subunits, causing a conformational change that allows greater  
58 mobility and activity of the C subunits, while maintaining localization of active kinase complexes (Smith et  
59 al., 2017). This spatiotemporal specificity is provided by A-kinase anchoring proteins (AKAPs), which bind  
60 and sequester PKA to subcellular locations, creating microdomains for localized downstream signaling  
61 (Langeberg & Scott, 2015; Scott & Pawson, 2009).

62 PKA signaling is well established to modulate cancer-relevant processes including growth factor  
63 signaling, cell migration, cell cycle regulation and control of cell metabolism. However, it remains unclear  
64 which oncogenic pathways downstream of PKA are essential, and which tissues or contexts they have the  
65 greatest impact (Burton & McKnight, 2007; London et al., 2020). DNAJ-PKAc stimulates ERK activation in  
66 an FLC model system (Turnham et al., 2019), operating via its interaction with AKAP-Lbc (Smith et al.,  
67 2010). In *GNAS*-mutant pancreatic tumor cells, PKAc-mediated suppression of the salt-inducible kinases  
68 (SIK1-3) supports tumor growth (Patra et al., 2018). PKAc has also been connected to control of G<sub>2</sub>/M  
69 transition (Grieco et al., 1996; Kotani et al., 1998) and to cell survival under glucose starvation (Palorini et  
70 al., 2016). Interestingly, PKA also has clear, but context-specific, tumor suppressive functions involving  
71 modulation of the Hedgehog and Hippo signaling pathways, and is mutationally inactivated in a subset of  
72 cancers (Iglesias-Bartolome et al., 2015; Tokita et al., 2019).

73 Despite its oncogenic action in multiple tumor types, PKAc is challenging to target directly.  
74 Consistent with the critical, widespread role of PKAc in normal physiology, mice with *PRKACA* deletion  
75 have less than 30% survival into adulthood (Skålhegg et al., 2002). Thus, a better understanding of the  
76 essential PKA effectors in individual tumor types is potentially a more tractable path for therapeutic  
77 development. In order to gain insight into oncogenic PKA signaling networks and to identify  
78 pharmacologically targetable downstream effects, we have explored its downstream kinases. We  
79 generated cell models with regulatable PKA activity and used them to produce a proteomic profile of PKA  
80 signaling. We show that elevated PKA signaling in models with genetic activation of the pathway, including  
81 FLC, promotes cell proliferation by increasing expression of c-MYC and n-MYC. In addition, we identify and  
82 validate a class of Aurora Kinase A (AURKA) inhibitors capable of blocking this process and PKA-driven  
83 tumor growth.

84

## 85 **Results**

### 86 ***PRKACA* alterations are common among cancer types**

87 We first sought to characterize the frequency and pattern of somatic mutations that impact PKA  
88 activity in human cancer in addition to FLC, which carries a unique *DNAJB1-PRKACA* fusion transcript in  
89 79-100% of cases (Cornella et al., 2015; Honeyman et al., 2014). We analyzed the frequency of PKA-  
90 activating somatic alterations in different types of human cancer reported by TCGA Pan Cancer Project  
91 (Weinstein et al., 2013), including both *PRKACA* gain-of-function and *PRKAR1A* loss-of-function mutations  
92 in addition to copy number alterations (Fig. 1A). We found an incidence of *PRKACA* amplification of 0.3-

93 3.2%, and a rate of activating mutations of 0.2-2.7% across multiple cancers. The greatest frequency of  
94 activation occurred in malignant peripheral nerve sheath tumors (MPNST) and ovarian cancers at 11.1  
95 and 11.3%, respectively. *PRKAR1A* loss of function was rarer, including both inactivating mutations (0.2-  
96 0.7%) and deep deletions (0.4-0.6%) that were predominantly detected in adrenocortical carcinoma (5.3%  
97 and 4.0%, respectively; Fig. 1B).

98  
99 We next obtained cell models with PKA-activating mutations to study the signaling effects of PKA  
100 through engineered PKAc activation or inhibition, as these cells should have intact oncogenic signaling  
101 downstream of PKA (Fig. 1C). These models include 639V (bladder cancer with *PRKACA* amplification  
102 (Barretina et al., 2012)) and Colo741 and ML1 (skin and thyroid cancer models with *PRKAR1A* frameshift  
103 mutations (Ghandi et al., 2019)). Each of these models has been profiled for PKA dependency in the  
104 context of the Cancer Dependency Map program, with Colo741 specifically being highly dependency on  
105 *PRKACA* (data accessed from depmap.org) (McFarland et al., 2018). We confirmed the dependency of  
106 Colo741 cells on PKAc by clonogenic assay following treatment with *PRKACA* siRNA or *NTC* (non-targeting  
107 control; Fig. 1D). We also test PKAc dependency in a novel cell line from a patient-derived xenograft model  
108 of FLC, designated FLX1 cells (Oikawa et al., 2015). FLX1 cells were treated with siRNA for *DNAJB1*, *PRKACA*,  
109 an equal part mixture of *DNAJB1* and *PRKACA*, or *NTC* for 36 hours, and then quantified by real-time  
110 microscopy. siRNA targeting either or both components of the fusion reduced cell proliferation rate by 63  
111 to 79% compared to *NTC* at 120 hours, demonstrating the dependency of these cells on the *DNAJB1*-  
112 *PRKACA* fusion (Fig. 1E).

#### 113 114 **Kinome profile of oncogenic PKA signaling**

115 To create stably inducible cell models for proteomic analysis, we introduced doxycycline (dox)-  
116 controlled 3xFLAG-*PRKACA* or *PRKAR1A*<sup>G325D</sup> into 639V, Colo741, and ML1 cells. Expression of PKA subunits  
117 was via lentiviral infection. The *PRKAR1A*<sup>G325D</sup> mutant exhibits impaired binding to cAMP, and thus serves  
118 as a dominant negative inhibitor of PKAc (Viste et al., 2005; Willis et al., 2011) (Fig. 1F). We confirmed that  
119 these constructs modulated PKA activity following dox induction, as assessed by immunoblot analysis  
120 using a phospho-PKA substrate antibody (Fig. 1G). We were not able to maintain the *PRKAR1A*<sup>G325D</sup>  
121 transgene in the Colo741 cell line, possibly due to leaky expression resulting in reduced cell viability via  
122 chronic partial inhibition of PKAc.

123 We used a combination of proteomic strategies and computational integration to screen for  
124 oncogenic kinases downstream of PKA. The engineered cells described above were cultured with or  
125 without dox for 48 hours and analyzed with our global phosphoproteomics and Multiplex Inhibitor Bead  
126 (MIBs) pipelines (Budzik et al., 2020; Coles et al., 2020; Donnella et al., 2018; Sos et al., 2014). Further  
127 bioinformatic analysis was performed on the global phosphoproteomic data set with the Phosphate analysis  
128 tool to infer changes in kinase activity (Ochoa et al., 2016). These complementary tools allow us to  
129 measure known kinase/substrate relationships (Phosphate) and directly assay the activity of kinases whose  
130 substrates are not well known (MIBs). We initially confirmed the desired impact of *PRKACA* and  
131 *PRKAR1A*<sup>G325D</sup> transgenes: using the 639V transgenic cell lines, we showed that the phosphorylation levels  
132 of the PKAc target SIK2 pS587 (Patra et al., 2018) increased with PKAc induction and decreased with PKA  
133 R1α<sup>G325D</sup> induction in our global phosphoproteomics analysis (Fig. 2A). Similarly, we detected upregulation  
134 of PKAc in both Phosphate and MIBs results following dox treatment of PKAc-inducible cells (Fig. 2B).

135 We next integrated the proteomics data in 4 categories: Phosphate for cells with inducible PKAc  
136 (Fig. 2C, top), Phosphate for cells with inducible PKA R1α<sup>G325D</sup> (Fig. 2C, bottom), MIBs for cells with inducible  
137 PKAc (Fig. 2D, top), and MIBs for cells with inducible PKA R1α<sup>G325D</sup> (Fig. 2D, bottom). Across these datasets,  
138 YES, LYN, EPHB4, LIMK1, LIMK2, CDK5, and CDK7 activity was reduced following PKAc overexpression and  
139 increased following PKAc inhibition by PKA R1α<sup>G325D</sup> expression; conversely, we saw that ROCK1 was  
140 upregulated following PKAc overexpression and downregulated following PKA R1α<sup>G325D</sup> expression. These

141 results provide important proof of concept for our genetic model system and are consistent with extensive  
142 data connecting PKAc and cell migration (Howe, 2004). Since agents targeting these kinases have yet to  
143 find application in cancer treatment, we focused credentialed drug targets among the list of candidates,  
144 based on their potential near-term therapeutic significance. In this regard, we observed upregulation of  
145 multiple pro-proliferative kinases including AURKA, BRAF, and AKT2 (marked in yellow); unexpectedly  
146 MAP2K2 was downregulated. Interestingly, we also observed downregulation of the tumor suppressor  
147 STK11 by PKAc. Fewer signaling changes influencing proliferation resulted from *PRKAR1A*<sup>G325D</sup> induction  
148 (Fig. 2C bottom, 2D bottom), although we note that our cell models have other oncogenic mutations  
149 acting on PKAc-regulated pathways that could maintain their activity despite PKA R1 $\alpha$ <sup>G325D</sup> expression.

150 Differences in isoform expression and redundant functions of kinases can obscure relationships  
151 between proteomic data sets when they are combined as above. Thus, we also used network propagation  
152 to integrate data across all of our cell models and both proteomic platforms (Cowen et al., 2017), using  
153 established pathway relationships from the ReactomeFl network to define functional connections  
154 between activate kinases within the PKA-regulated kinome (Wu & Haw, 2017). We then imported the  
155 propagated network into Cytoscape to visualize PKAc and its direct neighbors that are significantly altered  
156 when *PRKACA* or *PRKAR1A*<sup>G325D</sup> was induced (Fig. 2E). We formatted the analysis to show PKAc effects by  
157 altering the directionality of *PRKAR1A*<sup>G325D</sup>, such that kinases that are upregulated by PKAc function in  
158 either data set are marked as positive (red), and downregulated negative (blue). This analysis defined two  
159 functional PKA-dependent clusters with both networks including potential drug targets (marked with  
160 black borders). One is marked by growth factor signaling effectors such as BRAF, multiple MAPKs, AKT,  
161 PKCs as well as the receptor kinase ERBB2. Interestingly, a second network emerged, notable for multiple  
162 cell cycle kinases involved in the regulation of G<sub>2</sub>/M including AURKA, PLK1, GSK3 $\alpha/\beta$ , and several casein  
163 kinase family members.

164 We next assessed alterations in how PKAc overexpression affects sensitivity to inhibitors of these  
165 kinases in our ML1 cell model (Fig. S1A) There were three key findings: First, our analysis showed a minor  
166 decrease in sensitivity to MAPK pathway-targeted agents with PKAc induction. Second, we detected little  
167 impact on DNA-damage response targets. Third, we noted that PKAc induction increased sensitivity to the  
168 newly developed conformation-disrupting AURKA inhibitors (CD-AURKAI) CD-532 and MLN-8237. In  
169 contrast to the latter pharmacological effects, PKAc induction was unaffected by the older generation  
170 clinical candidate ENMD-2076 (Fig. S1B).

### 171 172 **AURKA inhibition with CD532 modulates c-MYC and n-MYC expression and cell proliferation**

173 We next screened this panel of AURKA inhibitors against the PKAc-dependent Colo741 and FLX1 cell lines.  
174 CD-AURKAI CD532 had a more marked effect on cell viability than any other compound (Fig. 3A) (Dauch  
175 et al., 2016; Gustafson et al., 2014). Importantly, drug sensitivities (EC<sub>50</sub> = 217.3 nM for Colo741; 692.8  
176 nM for FLX1) matched the reported dose range for inhibition of AURKA kinase activity (146.7-223.2 nM)  
177 (Gustafson et al., 2014). CD-AURKAI have been linked to MYC protein degradation by displacing MYC from  
178 AURKA containing complexes and allowing its ubiquitylation (Dauch et al., 2016; Gustafson et al., 2014).  
179 Accordingly, CD532 or MLN8237 treatment nearly abolished c-MYC expression in Colo741 cells; CD532  
180 was more active than MLN8237 in FLX1 in reducing by n-MYC and c-MYC expression (Fig. 3B). qRT-PCR  
181 showed that treatment with CD532 for 24hrs did not affect *MYC* or *MYCN* mRNA levels, consistent with  
182 an effect on stability of c-MYC and n-MYC proteins. In contrast, we observed significant downregulation  
183 of MYC target genes, including *E2F1* (p value = 0.0279) and *VCAN* (p value = 0.0491) (Fig. 3C).

184 Consistent with the functional relevance of MYC protein regulation downstream of PKAc, siRNA-  
185 mediated knockdown of c-MYC and n-MYC suppressed proliferation in Colo741 cells. Similar results were  
186 observed upon c-MYC siRNA knockdown in FLX1 cells (n-MYC is not expressed in Colo741; Fig. 3D, F).  
187 Conversely, ectopic expression of 3xFLAG-MYC or 3xFLAG-MYCN using a doxycycline-controlled system



188 increased proliferation of FLX1 cells (Fig. 3E, G). Thus, MYC-family proteins are important regulators of  
189 proliferation in PKA-dependent cancers.

190

#### 191 ***PRKACA* mediates c-MYC and n-MYC expression**

192 Although the role of AURKA in maintaining c-MYC and n-MYC stability has been previously reported  
193 (Dauch et al., 2016; Gustafson et al., 2014; Otto et al., 2009), it has not been directly connected to  
194 upstream oncogenic signaling. Accordingly, we examined whether PKAc induces c-MYC or n-MYC  
195 expression in PKA-driven cancer cell lines using gain- and loss-of-function approaches. Based on their  
196 dependence on PKA for proliferation, distinct PKA activating mutations and similar stabilization of MYC  
197 family members in response to PKA activation, we again used the Colo741 and FLX1 cell lines for these  
198 analyses.

199 To hyperactivate PKAc, we treated cells with forskolin (FSK), an adenylyl cyclase stimulator, and  
200 IBMX, a phosphodiesterase inhibitor. This drug combination generates sustained and supraphysiological  
201 production of intracellular cAMP. Immunoblot of cells treated for 0.5, 2, or 4 hours revealed rapid  
202 activation of PKA that correlated with progressive c-MYC and n-MYC stabilization (Fig. 4A) although AURKA  
203 levels were unchanged (Fig. S2). Conversely, siRNA targeting *PRKACA* in Colo741 and FLX1 resulted in  
204 attenuated PKA substrate phosphorylation and progressive decreases in c-MYC and n-MYC (when  
205 expressed) (Fig. 4B). Additionally, we generated an FLX1 cell line with the dox-inducible 3xFLAG-  
206 *PRKAR1A*<sup>G325D</sup> transgene, in which produced the expected reductions in PKA substrate phosphorylation  
207 and c-MYC and n-MYC levels (Fig. 4C).

208

#### 209 **PIM2 also regulates c-MYC and n-MYC expression in PKA-driven cells**

210 We further investigated the possibility that other kinases might act synergistically with AURKA to regulate  
211 MYC stability downstream of PKA. Using FLX1 cells, we screened a kinome-wide siRNA library for modifiers  
212 of cellular proliferation and identified 30 kinases whose genetic depletion reduced cell proliferation with  
213 a Z score < -1, and 20 kinases that increased proliferation (Fig. 5A). As indicated in Fig. 5A, we focused on  
214 non-metabolic kinases that reduced cellular proliferation and chose the most prominent candidate, *PIM2*,  
215 to directly test its effects on c-MYC expression in FLX1. *PIM2* is a serine/threonine kinase with similar  
216 substrates and function to AKT, and is also known to play a role in MYC regulation (Fox et al., 2003;  
217 Hammerman et al., 2005; Zhang et al., 2008). The related kinase *PIM1* was identified by the Phosphate  
218 analytical tool as an enzyme whose activity that is elevated in response to PKAc overexpression (Fig. 2C).  
219 This led to our working hypothesis that PKA-dependent mobilization of PIM kinases contributes to MYC  
220 expression. Consistent with this notion, we found that *PIM2* knockdown specifically reduced c-MYC  
221 expression in Colo741 cells, while *PIM1* did so in FLX1 cells (Fig. 5B). Next, we investigated a functional  
222 interplay between PIM kinases and AURKA inhibition. We found the PIM inhibitor CX-6258 alone reduced  
223 expression of c-MYC and n-MYC in both cell systems, and had a cooperative effect with MLN8237 in FLX1  
224 cells (Fig. 5C).

225 To determine whether *PIM2* is also responsive to PKA activation, Colo741 and FLX1 cells were  
226 treated with *PRKACA* siRNA or *NTC* for 24, 48 and 72 hours. *PIM2* levels were reduced in Colo741 and FLX1  
227 when *PRKACA* was knocked down (Fig. 5D). Moreover, ectopic expression of 3xFLAG-MYC or 3xFLAG-  
228 MYCN provoked a significant increase in *PIM2* in these cells (Fig. 5E). Conversely, siRNA mediated  
229 depletion of MYC reduced *PIM2* levels in both Colo741 and FLX1 cells (Fig. 5F). MYCN siRNA gene silencing  
230 in FLX1 cells had little effect (Fig. 5F). These results support a model where *PIM2* is responsive to PKA  
231 activity via its effect on c-MYC and n-MYC, and then feeds back to stabilize MYC (Fig. 5G).

232

#### 233 **PKA/MYC relationship in isogenic FLC models and human FLC samples**

234 To confirm the relationship between PKA and MYC in other FLC models, we used the recently described  
235 isogenic FLC model (Turnham et al., 2019), in which the *DNAJB1-PRKACA* fusion was CRISPR engineered

236 into AML12 immortalized murine hepatocytes. We once again saw that the engineered FLC clone had  
237 increased basal PKA activation, as well as higher c-MYC, n-MYC and PIM2 expression (Fig. 6A).

238 Finally, we assessed MYC protein levels in human FLC resection specimens. Here, when compared  
239 to adjacent non-transformed liver, we detected not only the DNAJ-PKAc fusion but also increased protein  
240 levels of both c-MYC and n-MYC, consistent with our findings in FLX1 cells. However, levels of AURKA and  
241 PIM2 were highly variable between tumor and adjacent liver, raising the possibility of additional  
242 mechanisms of c-MYC/n-MYC stabilization *in vivo* (Fig. 6B). Thus, while multiple factors may influence c-  
243 MYC and n-MYC expression in FLC *in vivo*, increased expression of one or both is a recurrent feature of  
244 this cancer.

## 245 246 **Discussion**

247 Over the last decade, tumor sequencing and mouse modeling studies have demonstrated the importance  
248 of GNAS/PKA signaling in cancer, revealing frequent oncogenic mutations in *GNAS* (O'Hayre et al., 2013).  
249 Related studies have delineated the essential role of PKAc as its effector (Coles et al., 2020; Patra et al.,  
250 2018). Here, we define the context of genetic alterations in *PRKACA* and *PRKAR1A* that result in PKAc  
251 activation in cancer and a set of conserved pathways downstream oncogenic PKAc signaling.

252  
253 Our proteomic analysis has uncovered both expected and novel regulatory effects of PKA modulation in  
254 cancer cell lines. In addition to activation of the AKT and BRAF pathways, we noted inhibitory effects of  
255 PKA on various kinases, including STK11 and its effectors. We also noted strong modulation of kinases  
256 involved in cell migration (eg. YES, EPHB4, LIMK1, LIMK2, and ROCK1). These interesting observations  
257 merit further investigation into mechanistic underpinnings of PKA-associated malignancies. Network  
258 propagation allowed us to identify two functional clusters in PKA-driven signaling, one driven primary by  
259 the RAS/MAPK pathway, and the other by nucleated AURKA, the latter of which was particularly intriguing.  
260 AURKA activation is an important step in meiosis, an event that is triggered by PKAc (Frank-Vaillant et al.,  
261 2000; Pascreau et al., 2005; Solc et al., 2010). AURKA upregulation has also been noted in *GNAS* (Coles et  
262 al., 2020) and PKA-driven malignancies (Simon et al., 2015). Here, we connect the PKA-AURKA to  
263 stabilization of MYC family members, which we demonstrate as a key element of PKA-driven oncogenic  
264 proliferation. Of note, prior work on PKA in cancer, particularly in the context of *GNAS*, has typically been  
265 done in systems with concomitant RAS/MAPK pathway alterations (Patra et al., 2018). As FLC rarely bears  
266 additional oncogenic mutations (Cornella et al., 2015; Honeyman et al., 2014), the overlapping results  
267 from these genetically distinct cell lines suggest that PKAc itself exerts a specific influence in  
268 carcinogenesis.

269  
270 This work highlights the utility of our newly developed FLX1 cells, the first FLC derived cell line, as well as  
271 our dox-controlled PKA regulatable system to generate PKA kinome profiles. FLX1 cells were derived from  
272 a well-characterized FLC PDX (Dinh et al., 2017), and contain the *DNAJ1-PRKACA* fusion as their primary  
273 oncogenic driver. This later feature permitted us to interrogate the direct effects of the fusion kinase. By  
274 genetically modulating PKA signaling either by hyper-activation or expression of dominant-negative  
275 constructs, we are able to define downstream effectors of PKA activating or inhibiting compounds.  
276 Another valuable feature of this approach is the ability to pinpoint PKA independent off-target effects of  
277 commonly used PKA-modulating tool compounds. Despite these positive attributes, our models have  
278 limitations. For example, PKA signaling is well known to be precisely spatiotemporally regulated (Bauman  
279 et al., 2006; Coghlan et al., 1995; Hausken et al., 1996), and our overexpression systems do not allow  
280 compartmentalized control of PKA signaling. Additionally, most cell lines used in this study contain  
281 oncogenic mutations in addition to their PKA alteration, and it is anticipated that these co-existing  
282 mutations may interact with modulated PKA activity to alter the final signaling outcomes. Thus, the  
283 identification and development of more PKA-driven cancer cell models is essential.

284  
285 The data herein support the notion that c-MYC and n-MYC are important effectors of PKA-driven  
286 oncogenesis. We found that PKA activity modulates c-MYC protein levels in multiple cell models, and both  
287 c-MYC and n-MYC are up-regulated in FLX1 cells. We note that co-expression of c-MYC and n-MYC is  
288 relatively atypical in human cancer, with the exception of neuroblastoma (R. Huang et al., 2011), but we  
289 found co-induction in human FLC, suggesting that it is characteristic of this cancer. This finding opens a  
290 number of interesting avenues for further research. First, while the stabilization of MYC family members  
291 by AURKA is well established (Dauch et al., 2016; Gustafson et al., 2014; Richards et al., 2016), mechanistic  
292 aspects of this important phenomena are not fully elucidated. PKA activation of AURKA and parallel effects  
293 on PIM2 infer that further investigation of the factors that control the relative contributions of these  
294 kinases to MYC regulation is a worthwhile endeavor. Similarly, the key transcriptional mediators of the  
295 effects of c-MYC and n-MYC on cell growth in FLX1 cells and in FLC remain unknown. Moreover, the extent  
296 to which MYC may interact with other key transcription factors such as CRTC2 (Hollstein et al., 2019) or  
297 AP-1/CREB (Dinh et al., 2020) unknown. Thus, our discovery of this new means of PKA-responsive MYC  
298 activation warrants further investigation.

299  
300 There is an urgent need for new therapies for PKA-driven malignancies. This challenge is especially  
301 pronounced in the case of FLC, where there is no clear standard of care and therapy is not currently  
302 tailored to the mechanisms of tumor growth. While further mechanistic investigation and more advanced  
303 compounds are needed, our data suggest that CD-AURKAi may improve outcomes for patients with few  
304 options, who currently face a grim prognosis.

## 305 306 **Materials and Methods**

### 307 308 **Cell culture reagents and treatment:**

309 Human bladder 639V cells, human skin Colo741 cells, and human thyroid ML1 cells were maintained in  
310 Dulbecco's modified Eagle's medium (DMEM) supplemented with 10% fetal bovine serum (FBS), penicillin  
311 (100 U/ml) and streptomycin (100 U/ml). The murine hepatocyte AML12 WT and AML12<sup>DNAJ-PKAc</sup> cell lines  
312 were developed as described previously (Turnham et al., 2019). These cells were maintained in 50:50  
313 DMEM/Nutrient Mixture F-12 (F-12) supplemented with 10% FBS, 0.1X ITS liquid media supplement,  
314 dexamethasone (0.1 uM) and gentamicin (50 ug/ml). FLX1 cells were derived from a human FLC tumor  
315 and xenografted to mice through dispersal and direct plating onto cell culture, and maintained in RPMI  
316 with 50 ng/ml HGF, 10% FBS, penicillin (100 U/ml) and streptomycin (100 U/ml). All cells were cultured in  
317 a 37°C incubator with 5% CO<sub>2</sub>. Cells were tested for mycoplasma contamination routinely. Recombinant  
318 HGF was obtained from PeproTech; dexamethasone, forskolin, gentamicin, IBMX (3-isobutyl-1-  
319 methylxanthine), and 100X ITS liquid media supplement from Millipore Sigma; CD532, DMEM, DMEM/F-  
320 12, RPMI, FBS, Lipofectamine RNAiMAX Reagent, Opti-MEM and penicillin-streptomycin from Thermo  
321 Fisher Scientific; and MLN8237 and CX-6258 from Selleckchem. The human protein kinase siGENOME  
322 siRNA library was obtained from GE Dharmacon. FuGENE 6 transfection reagent and CellTiter-Glo assay  
323 system were obtained from Promega. SMARTpool siGENOME siRNA targeting NTC, *DNAJB1*, *MYC*, *MYCN*,  
324 *PIM1*, *PIM2* and *PRKACA* were purchased from Dharmacon.

325 For individual experiments, cells were seeded at 200,000 cells in 6 cm dishes overnight before  
326 treatment, except FLX1 cells, which grew for 2 nights. For drug treatment, a final concentration of 50uM  
327 IBMX, 50uM FSK and 1uM of the indicated drug were added to the cells in this order for the desired time  
328 periods and harvested. For siRNA treatment, 12 ul of 20 uM siRNA were added to the cells with  
329 Lipofectamine RNAiMAX reagent in Opti-MEM, incubated for 72 hours, and harvested.

### 330 331 **Clonogenic Assay**

332 100,000 cells were plated in 6 cm dishes, treated with siRNA for 24 hours, transferred to a 6-well plate at  
333 5,000 cells per well, incubated at 37°C and 5% CO<sub>2</sub> for 24 days, and stained with 6.0% glutaraldehyde  
334 (vol/vol) and 0.5% crystal violet (wt/vol) in H<sub>2</sub>O (Franken et al., 2006).

335

#### 336 **DNA transfections and lentivirus production**

337 Plasmids containing *PRKACA*, *PRKAR1A*, *MYC* and *MYCN* were obtained from the Human ORFeome v8.1  
338 Collection, addgene, or DNASU and cloned into a gateway compatible version of pLVX-Tet-One (puro) with  
339 3xFLAG tag at the N terminal (for *PRKAR1A*, *MYC* and *MYCN*) or C terminal (for *PRKACA*). The *PRKAR1A*<sup>G325D</sup>  
340 single point mutation was introduced using standard PCR technique. The final plasmids were packaged in  
341 HEK 293T cells for 72 hours to produce lentivirus, which were used to establish cell lines with respective  
342 transgene.

343

#### 344 **SDS-PAGE and immunoblotting.**

345 Cells were harvested physically and lysed in RIPA buffer with protease and protein phosphatase inhibitors.  
346 Protein concentration of cleared lysate was determined by BCA Protein Assay (Pierce). Lysates were  
347 separated in 4–12% NuPAGE gradient gels (Thermo Fisher), transferred to nitrocellulose membrane and  
348 blocked with 5% milk in TBST using standard technique. Blocked membranes were immunoblotted with  
349 antibodies against the following targets separately: AURKA (CST #14475, Biolegend #603301), Phospho-  
350 PKA Substrate (CST#9624), c-MYC (CST#18583), n-MYC (CST#84406), PIM1 (CST#3247), PIM2 (CST#4730),  
351 PKAC- $\alpha$  (CST#4782), PKAR1a (CST#5675), FLAG (Sigma#F1804), Actin (CST#3700) or COXIV (CST#5247).  
352 Afterward, blotted membranes were washed in TBST, incubated with appropriate HRP-labelled secondary  
353 antibodies (CST#7074, 7076), probed with ECL reagents (Thermo Fisher) and developed by x-ray. Blots  
354 were washed and stripped with Restore Plus stripping buffer (Thermo Fisher) if multiple probes were  
355 required.

356

#### 357 **Quantitative RT-PCR**

358 Colo741 and FLX1 cells were seeded and treated in the same manner as described for immunoblotting in  
359 preparation for siRNA treatments. RNA was extracted with Trizol reagent (Thermo Fisher) according to  
360 the manufacturer's instructions and quantified with a NanoDrop instrument. Normalized RNA was reverse  
361 transcribed with SuperScript II Reverse Transcriptase (Invitrogen). cDNAs were added to PerfeCTa SYBR  
362 Green FastMix Reaction Mixes (QuantaBio) and respective primers and analyzed using the BioRad CFX  
363 Connect Real-Time PCR Detection System. Primers were designed with Primer3 (Untergasser et al., 2012)  
364 and obtained from Elim Biopharmaceuticals (S. Table. 1).

365

#### 366 **Cell viability assay**

367 Cells were seeded into 96 well white opaque plates (Greiner) at 2,000 cells per well and incubated at 37°C  
368 and 5% CO<sub>2</sub> overnight. Cells were treated with selected drugs at different final concentrations and  
369 incubated for another 72 hours, though FLX1 cells were incubated for 120 hours due to slow growing  
370 speed. After incubation, plates and CellTiter-Glo (CTG) reagent were allowed to equilibrate at room  
371 temperature on the bench for 30 minutes. The CTG assay was performed as instructed and measured with  
372 the SpectraMax i3 Multi-Mode Platform (Molecular Devices).

373

#### 374 **Cell proliferation curves**

375 For experiments with transgenic FLX1 cells, 5333 cells of each line were seeded into black clear bottom  
376 96 well plates (Corning) in 100  $\mu$ l of media with or without dox (1  $\mu$ g/ml). After seeding, plates were  
377 immediately incubated at 37°C and 5% CO<sub>2</sub> inside the Incucyte Zoom system (Essen BioScience) for live  
378 cell image and confluence analysis. For experiments with parental cells and siRNA, Colo741 and FLX1 cells  
379 were plated and treated with siRNA as described above. Instead of harvesting the cells physically at 72



380 hours after siRNA treatment, the cells were trypsinized after 24 hours of siRNA treatment and transferred  
381 to a black clear bottom 96 well plate at 500 cells per well. The plates were allowed to incubate at 37°C  
382 and 5% CO<sub>2</sub> for 24 or 36 hours and moved to the Incucyte for further incubation. Once the plates were  
383 mounted inside the Incucyte system, pictures of each well were taken every 2 hours for confluence  
384 analysis.

### 385 386 **siRNA kinase library screening**

387 384 well plates containing the human protein kinase siGENOME siRNA library (Dharmacon Cat#G-003505)  
388 were thawed at room temperature and centrifuged at 1000 rpm for 5 minutes prior to foil removal. 50ul  
389 of nuclease-free dH<sub>2</sub>O was added to each well to reconstitute the siRNA at a final concentration 5uM.  
390 Using a Labcyte Echo 525 liquid handling machine, 200nl of reconstituted siRNA from each well from the  
391 master plates was transferred to the same position of the corresponding black transparent bottom 384  
392 well daughter plates (Thermo Fisher). Unused aliquoted plates were sealed with foil, covered with plastic  
393 lid and stored at -80C. For subsequent experiments, daughter plates with deposited siRNA were thawed  
394 at room temperature and centrifuged. 5ul of nuclease-free dH<sub>2</sub>O was added to each well and agitated at  
395 room temperature for 30 min. 10ul of a mixture of RNAiMAX and Opti-MEM was then added to each well  
396 and incubated at RT for 20 mins. Finally, 500 FLX1 cells in 30 ul media were added to each well. The plates  
397 were transferred to the Incucyte for cell proliferation monitoring.

### 398 399 **TCGA analysis**

400 TCGA PanCancer Project data between 3/13/18 and 4/23/18 were accessed through cBioPortal (at  
401 <https://www.cbioportal.org>) and queried by gene (e.g. *PRKACA*, *PRKAR1A*). Data were sorted through  
402 *Cancer Types Summary* function and exported to Microsoft Excel and Prism for reorganization and analysis.

### 403 404 **Phosphoproteomics**

405 Transgenic cell lines with doxycycline-controlled 3xFLAG-*PRKACA* or *PRKAR1A*<sup>G325D</sup> constructs were  
406 treated with DMSO or doxycycline for 48 hours. Cells were then harvested in PBS, lysed in lysis buffer  
407 (8uM urea, 50mM Tris pH 8, 75mM NaCl, 1X protease and phosphatase inhibitors) and sonicated at 20%  
408 for 15 sec. Bicinchoninic acid (BCA) protein assay was performed to quantify protein lysates. Samples were  
409 reduced with 5mM dithiothreitol (DTT), cooled to room temperature, alkylated with 15mM  
410 iodoacetamide, quenched with 15mM DTT, diluted with 50mM Tris pH 8 to <2M urea, and subjected to  
411 trypsin digestion at 37C overnight. Samples were acidified with 10% trifluoroacetic acid (TFA). 50mg  
412 Seppak cartridges were set up on vacuum, and columns were washed with series of MS-grade acetonitrile  
413 (ACN), 70% ACN/0.25% acetic acid (AA), and 0.1% TFA buffers. After letting samples drip through columns,  
414 columns were washed with 0.1% TFA and 0.5% AA. Samples were eluted and lyophilized in a speed  
415 vacuum concentrator, and phosphopeptide enrichment was performed with immobilized metal affinity  
416 chromatography following established protocols (Budzik et al., 2020). Phosphopeptides were eluted in  
417 50% ACN/0.1% formic acid (FA) and dried on a speed vacuum concentrator. Enriched samples were  
418 analyzed on a Q Exactive Orbitrap Plus mass spectrometry system (Thermo Fisher Scientific) with an Easy  
419 nLC 1200 ultra-high pressure liquid chromatography system (Thermo Fisher Scientific) interfaced via a  
420 Nanospray Flex nanoelectrospray source. Samples were injected on a C18 reverse phase column (25cm x  
421 75uM packed with ReprosilPur C18 AQ 1.9 uM particles). Mobile phase A consisted of 0.1% FA and mobile  
422 phase B consisted of 80% ACN/0.1% FA. Peptides were separated by an organic gradient from 2% to 18%  
423 mobile phase B over 94 minutes followed by an increase to 34% B over 40 minutes, then held at 90% B  
424 for 6 minutes at a flow rate of 300 nL/minute. MS1 data was acquired with a 3e6 AGC target, maximum  
425 injection time of 100ms, and 70K resolution. MS2 data was for the 15 most abundant precursors using  
426 automatic dynamic exclusion, a normalized collision energy of 27, 1e5 AGC, a maximum injection time of

427 120ms, and a 17.5K resolution. All mass spectrometry was performed at the Thermo Fisher Scientific  
428 Proteomics Facility for Disease Target Discovery at UCSF and the J. David Gladstone Institutes.

429  
430 Mass spectrometry data was assigned to human sequences and peptide identification and label-free  
431 quantification were performed with MaxQuant (version 1.5.5.1) (Tyanova et al., 2016). Data were  
432 searched against the UniProt human protein database (downloaded 2017). Trypsin/P was selected  
433 allowing up to 2 two missed cleavages, and variable modification was allowed for methionine oxidation,  
434 N-terminal protein acetylation, and phosphorylation of serine, threonine, and tyrosine, in addition to a  
435 fixed modification for carbamidomethyl cysteine. The other MaxQuant settings were left as default.  
436 Statistical analysis was performed using R (version 3.6.3) , RStudio, and the MSstats Bioconductor package  
437 (Choi et al., 2014). Contaminants and decoy hits were removed, and samples were normalized across  
438 fractions by equalizing the median log<sub>2</sub>-transformed MS1 intensity distributions. Log<sub>2</sub>(fold change) for  
439 protein phosphorylation sites were calculated, along with p-values. Phosphoproteomic data was uploaded  
440 to the PhosFate profiler tool (Phosfate.com, Ochoa et al., 2016) to infer kinase activity. The mass  
441 spectrometry RAW mass spectrum files will be deposited into ProteomeXchange via the PRIDE partner  
442 repository.

#### 443 444 **MIBs**

445 MIBs were performed as described previously (Donnella et al., 2018; Sos et al., 2014). Kinase inhibitor  
446 compounds were purchased or synthesized and coupled to sepharose beads using 1-Ethyl-3-(3-  
447 dimethylaminopropyl)carbodiimide chemistry. Transgenic cell lines with doxycycline-controlled Tet-on  
448 3xFLAG-*PRKACA* or *PRKAR1A*<sup>G325D</sup> constructs were treated with DMSO or doxycycline for 48 hours then  
449 collected in PBS. Samples were lysed in 150mM NaCl buffer with protease and phosphatase inhibitors.  
450 Lysates were diluted with 5M NaCl and high-salt binding buffer (50mM Hepes pH 7.5, 1M NaCl, 0.5% Triton  
451 X-100, 1mM EDTA, 1mM EGTA). Pre-washed columns containing ECH sepharose 4B and EAH sepharose  
452 4B beads were layered with kinase inhibitor-coupled beads as follows: 200uL JG-4, 100uL VI-16832, 75uL  
453 staurosporin, 100uL PP-hydroxyl, 100uL purvalanol B, 50uL GDC, 100uL dasatinib, 50uL sorafenib, 50uL  
454 crizotinib, 50uL lapatinib, 50uL SB202190, 50uL bisindolylmaleimide X. Columns were washed with high  
455 salt buffer without disturbing bead layers, and affinity purification was performed with gravity  
456 chromatography. Bound kinases were washed with high salt buffer, low salt buffer (50mM Hepes pH 7.5,  
457 150mM NaCl, 0.5% Triton X-100, 1mM EDTA, 1mM EGTA), and 0.1% (w/v) SDS in high salt buffer. Samples  
458 were eluted twice by capping the column, applying 300uL of elution buffer (0.5% SDS/1% BME/0.1M Tris-  
459 HCL pH 6.8) to the column, vortexing, heating to 98C, removing caps, and allowing elution to flow through  
460 by gravity. Samples were frozen at -80C overnight, reduced with 500mM DTT, cooled to room  
461 temperature, and treated with 500mM iodoacetamide. Methanol/chloroform precipitation, trypsin  
462 digestion at 37C overnight, and desalting were performed on all samples. Enriched samples were analyzed  
463 on a Q Exactive Orbitrap Plus mass spectrometry system (Thermo Fisher Scientific) with an Easy nLC 1200  
464 ultra-high pressure liquid chromatography system (Thermo Fisher Scientific) interfaced via a Nanospray  
465 Flex nanoelectrospray source as described above for global phosphoproteomics. All mass spectrometry  
466 was performed at the Thermo Fisher Scientific Proteomics Facility for Disease Target Discovery at UCSF  
467 and the J. David Gladstone Institutes.

468  
469 Peptides were identified with MaxQuant (version 1.5.5.1) and label-free quantification was performed  
470 with Skyline (Schilling et al., 2012), with Trypsin [KR|P] selected and allowing up to two missed cleavages.  
471 Full scan MS1 filtering was performed with 70,000 resolving power at 400 m/z using the Orbitrap.  
472 Statistical analysis was performed with R, RStudio, and MSstats (Choi et al., 2014) to calculate log<sub>2</sub>(fold  
473 change) and p-values of detected kinases. As above, mass spectrometry RAW mass spectrum files will be  
474 deposited into ProteomeXchange via PRIDE.

475  
476  
477  
478  
479  
480  
481  
482  
483  
484  
485  
486  
487  
488  
489  
490  
491  
492  
493  
494  
495  
496  
497  
498  
499  
500  
501  
502  
503  
504  
505  
506  
507  
508  
509  
510  
511  
512  
513  
514  
515  
516  
517  
518  
519  
520  
521  
522

## Network Propagation

The log(2) fold change values of MIBs data and effect size (ES) of Phosphate data for each transgenic cell line treated with or without doxycycline were separately normalized out of one. The union of these two datasets was generated and any duplicate genes were averaged. Z-scores were then calculated and the absolute values of the z-scores for each cell line were separately propagated across the ReactomeFI network using a MATLAB script (J. K. Huang et al., 2018). Propagated heat scores for each gene were multiplied across cell lines containing the same construct (either Tet-on 3xFLAG-*PRKACA* or *PRKAR1A*<sup>G325D</sup>), and significance was calculated based on the probability that propagated heat scores match a permuted value by chance. Significant genes (p-value < 0.05) brought out by the network were then extracted and imported into Cytoscape (Shannon et al., 2003). To integrate transgenic cell lines with Tet-on 3xFLAG-*PRKACA* or *PRKAR1A*<sup>G325D</sup>, overlapping direct neighbors of *PRKACA* and their interconnections were extracted. The signs of the averaged z-scores of the Tet-on 3xFLAG-*PRKAR1A*<sup>G325D</sup> lines were flipped and averaged with the averaged z-scores of the Tet-on 3xFLAG-*PRKACA* lines, resulting in a final subnetwork for PKAc. Nodes representing the genes were filled to represent the original z-scores which were averaged across cell lines. Networks were searched on Cytoscape for PKAc and its direct neighbors and any interconnections.

## Human FLC samples

Human FLCs and paired normal livers were obtained from the University of Washington Medical Center and Seattle Children's Hospital after institutional review board approval (SCH IRB #15277). For prospective fresh tissue collections, informed consent was obtained from the subject and/or parent prior to resection. Fresh/frozen human FLC and paired non-tumor livers were homogenized in RIPA buffer with protease inhibitors using a hand-hold Pro200 homogenizer (ProScientific). Protein concentration of cleared lysate was determined by BCA Protein Assay (Pierce). Lysate were separated by 10% TGX gels (Biorad), transferred to nitrocellulose membrane and blocked with 5% milk in TBST using standard technique. Blocked membranes were immunoblotted with antibodies against following targets separately: PKAc- $\alpha$  (CST#4782), c-MYC (CST#18583), n-MYC (CST#84406), PIM2 (CST#4730), AURKA (Biolegend#603301) or Actin (Sigma#A5441). Afterward, blotted membranes were washed in TBST, incubated with appropriate HRP-labelled secondary antibodies (GE Healthcare Life Sciences), washed as before and developed using ECL (Thermo Fisher) on an iBright FL1000.

## Figure legends:

**Figure 1. Recurrent PKA activating somatic alterations in human cancer.** (A) Pathway illustrations of different PKA activating genomic alterations. Top left: *PRKACA* amplification. Top right: *DNAJB1-PRKACA* fusion. Bottom left: *PRKAR1A* inactivation or deletion. Bottom right: *PRKACA* activation. (B) TCGA PanCancer Project analysis shows the frequency of *PRKACA* gain-of-function (red and yellow) and *PRKAR1A* loss-of-function (green and blue) alterations in various cancer types. The reported frequency of *DNAJB1-PRKACA* fusion in FLC clinical samples is also included. (C) Cell lines used in this study, their PKA related mutation, *PRKACA* dependency and inclusion in proteomic analyses. (D) Clonogenic assay of Colo741 cells treated with *NTC* (left) or *PRKACA* (right) siRNA. Experiments were done twice with different cell density, and two of the three technical replications from the best representation were shown. (E) Relative confluence of FLX1 cells in 96 wells plate treated with *NTC*, *DNAJB1*, *PRKACA* or a mixture (50:50) of *DNAJB1* and *PRKACA* siRNA. 120 hours is marked with the dashed line. Result was the mean  $\pm$ s.d of one biological replicate, n = 15 for each condition. (F) Schematic of doxycycline-induced PKAc modulating system. Left: Tet-on 3xFLAG-*PRKACA*. Right: Tet-on 3xFLAG-*PRKAR1A*<sup>G325D</sup>. (G) Immunoblots showing the change of PKA activity, as indicated by phospho-PKA substrate, in different cell lines with dox-inducible

523 3xFLAG-*PRKACA* or *PRKAR1A*<sup>G325D</sup> with 1 ug/ml doxycycline (dox) for 48 hours. Left: transgenic cell lines  
524 with Tet-on 3xFLAG-*PRKACA*. Right: transgenic cell lines with Tet-on 3xFLAG-*PRKAR1A*<sup>G325D</sup>.

525  
526 **Figure 2. Kinome profiling to identify signaling nodes downstream of *PRKACA*.** (A) Global  
527 phosphorylation change based on combined analysis of Phosfate and MIBs using 639V with *PRKACA* or  
528 *PRKAR1A*<sup>G325D</sup> induced. (B) Change in kinase activity based on Phosfate analysis or MIBs pipeline using  
529 639V Tet-on 3xFLAG-*PRKACA* compared to control. (C) In intersect, inferred kinase activity changes based  
530 on global phosphoproteomics using the Phosfate analysis tool averaged across different transgenic cell  
531 lines, with versus without dox induction. (top) 639V, Colo741, and ML1 cells with Tet-on 3xFLAG-*PRKACA*.  
532 (Bottom) 639V and ML1 with Tet-on 3xFLAG-*PRKAR1A*<sup>G325D</sup>. (D) In intersect, kinase activity changes based  
533 on MIBS averaged across different transgenic cell lines, with versus without dox induction. (top) 639V,  
534 Colo741, and ML1 cells with Tet-on 3xFLAG-*PRKACA*. (Bottom) 639V and ML1 with Tet-on 3xFLAG-  
535 *PRKAR1A*<sup>G325D</sup>. (E) MIBs and Phosfate kinome profiles from 639V, Colo741 and ML1 with Tet-on 3xFLAG-  
536 *PRKACA* and 639V and ML1 with Tet-on 3xFLAG-*PRKAR1A*<sup>G325D</sup> were integrated by network propagation.  
537 Each node was filled to represent the original z-scores of kinase activity, which were averaged across cell  
538 lines.

539  
540 **S. Figure 1. Elevated PKA activity alters drug sensitivity.** (A) ML1 cells with Tet-on 3xFLAG-*PRKACA* in 96-  
541 well plates with or without dox were treated with various types of inhibitors for 72h at different  
542 concentrations, and their relative cell viability was measured by CTG assay versus untreated control  
543 samples. Results are the mean  $\pm$ s.d of one to three biological replicates, three technical replicates per  
544 biological replicate. (B) Relative cell viability of ML1 cells with Tet-on 3xFLAG-*PRKACA* with or without dox  
545 after treating with various types of AURKA inhibitors for 72h at different concentrations. Results are the  
546 mean  $\pm$ s.d of one biological replicates, three technical replicates per biological replicate.

547  
548 **Figure 3. c-MYC and n-MYC promote proliferation of PKA-dependent cell models.** (A) Colo741 and FLX1  
549 cells in 96-well plates were treated with various types of AURKA inhibitors for 72h at different  
550 concentrations, and their relative cell viability was measured by CTG assay versus untreated control  
551 samples. Results are the mean  $\pm$ s.e.m of triple biological replicates, three technical replicates per  
552 biological replicate. Inhibitors are colored based on their binding mode. (B) Immunoblots showing the  
553 expression of c-MYC and n-MYC in Colo741 and FLX1 cells after treating with CD532 or MLN8237 for 24  
554 hours. (C) RT-qPCR analysis of *MYC*, *MYCN* and their downstream genes in FLX1 cells treated with 1uM  
555 CD532 for 24 hours. Results are the mean  $\pm$ s.e.m of three biological replicates, three technical replicates  
556 for each biological replicate, targets with P value <0.05 form paired t-test for CD532 treated versus DMSO  
557 were labelled with the asterisk. (D) Immunoblots showing the change of c-MYC and n-MYC levels in  
558 Colo741 and FLX1 cells after *MYC* or *MYCN* siRNA knockdown for 48 hours. (E) Immunoblots showing the  
559 induction of Tet-on 3xFLAG-*MYC* and *MYCN* in respective FLX1 transgenic cells after dox induction for 48  
560 hours. (F) Relative confluence of Colo741 and FLX1 cells in 96 well plates after *MYC* or *MYCN* knockdown  
561 with siRNA. FLX1 cells were incubated 36 hours before recording to ensure better adhesion. Experiments  
562 were done in duplicate and representative results were shown with mean  $\pm$ s.d, n = 10 for each condition.  
563 (G) Relative confluence of transgenic FLX1 cells with doxycycline-controlled Tet-on 3xFLAG-*MYC* or *MYCN*  
564 in 96 well plates after treatment with or without 1ug/ml dox. Confluence was imaged for 120 hours and  
565 analyzed by Incucyte. Experiment was duplicate, the representative results shown with mean  $\pm$ s.d, n = 6  
566 for each condition.

567  
568 **Figure 4. PKA activity increases c-MYC and n-MYC protein levels.** (A) Immunoblots showing the change  
569 of PKA activity, as indicated by phospho-PKA substrate, and c-MYC and n-MYC expression in Colo741 and  
570 FLX1 cells after treating with 50uM FSK and 50uM IBMX for 0, 30 minutes, 2 and 4 hours. (B) Immunoblots



571 showing the change of PKA activity and PKAc, c-MYC and n-MYC expressions in Colo741 and FLX1 cells  
572 after *PRKACA* siRNA knockdown for 24, 48 and 72 hours vs. 72 hours with non-targeting control (NTC). (C)  
573 Immunoblots showing the change of PKA activity and c-MYC and n-MYC levels in transgenic FLX1 cells with  
574 Tet-on 3xFLAG-*PRKAR1A*<sup>G325D</sup> with or without dox for 72 hours.

575  
576 **S. Figure 2. PKA activity has little effect on AURKA protein level.** Immunoblots showing the AURKA  
577 expression in Colo741 and FLX1 cells after treating with 50uM FSK for 0, 30 minutes, and 4 hours.

578  
579 **Figure 5. PIM2 increases c-MYC /n-MYC expression in cooperation with AURKA.** (A) siRNA kinase library  
580 screen with FLX1 in 384 well plates for 7 days; shows the effect of each target kinase on cell proliferation  
581 (average of 3 biological replicates). Selected non-metabolic kinases that decrease cell proliferation with  
582 z-score < -1 were marked. (B) Immunoblots showing the change of c-MYC and n-MYC levels in Colo741  
583 and FLX1 cells after *PIM1* or *PIM2* siRNA knockdown for 48 hours. (C) Immunoblot showing the change of  
584 PKA activity, as indicated by phospho-PKA substrate, and c-MYC and n-MYC levels in Colo741 and FLX1  
585 cells after treating with DMSO, 1uM CD532, 1uM MLN8237, 1uM CX6258 or combination of 1uM  
586 MLN8237 and 1uM CX6258 for 24 hours. (D) Immunoblots showing the change of PIM2 expression in  
587 Colo741 and FLX1 cells after *PRKACA* siRNA knockdown for 24, 48 and 72 hours and NTC for 72 hours. (E)  
588 Immunoblots showing the change of PIM2 level after *MYC* or *MYCN* overexpression in Colo741 or FLX1  
589 transgenic cells after dox induction for 48 hours. (F) Immunoblots showing the change of PIM2 levels in  
590 Colo741 and FLX1 cells after *MYC* or *MYCN* siRNA knockdown for 48 hours. (G) Schematic of DNAJ-PKAc  
591 mediating cell proliferation in FLC by stabilizing MYC family proteins via AURKA and producing a positive  
592 feedback loop with PIM2.

593  
594 **Figure 6. Higher c-MYC and n-MYC protein levels are found in human FLC tumor samples.** (A)  
595 Immunoblots showing the basal level of PKA activity in phosphorylated PKA substrate and c-MYC, n-MYC,  
596 and PIM2 in AML12 WT (left) and AML12<sup>DNAJ-PKAc</sup> cells (right). (B) Immunoblot showing the presence of  
597 DNAJ-PKAc and different level of c-MYC, n-MYC, AURKA and PIM2 in FLC tumor samples (FLC) versus  
598 adjacent liver (N) from 4 FLC patients.

599  
600  
601 Barretina, J., Caponigro, G., Stransky, N., Venkatesan, K., Margolin, A. A., Kim, S., Wilson, C.  
602 J., Lehár, J., Kryukov, G. V., Sonkin, D., Reddy, A., Liu, M., Murray, L., Berger, M. F.,  
603 Monahan, J. E., Morais, P., Meltzer, J., Korejwa, A., Jané-Valbuena, J., ... Garraway, L. A.  
604 (2012). The Cancer Cell Line Encyclopedia enables predictive modelling of anticancer drug  
605 sensitivity. *Nature*, 483(7391), 603–607. <https://doi.org/10.1038/nature11003>  
606 Bauman, A. L., Soughayer, J., Nguyen, B. T., Willoughby, D., Carnegie, G. K., Wong, W.,  
607 Hoshi, N., Langeberg, L. K., Cooper, D. M. F., Dessauer, C. W., & Scott, J. D. (2006).  
608 Dynamic Regulation of cAMP Synthesis through Anchored PKA-Adenylyl Cyclase V/VI  
609 Complexes. *Molecular Cell*, 23(6), 925–931. <https://doi.org/10.1016/j.molcel.2006.07.025>  
610 Berthon, A. S., Szarek, E., & Stratakis, C. A. (2015). *PRKACA*: The catalytic subunit of protein  
611 kinase A and adrenocortical tumors. In *Frontiers in Cell and Developmental Biology* (Vol.  
612 3, Issue MAY, p. 26). Frontiers Media S.A. <https://doi.org/10.3389/fcell.2015.00026>  
613 Budzik, J. M., Swaney, D. L., Jimenez-Morales, D., Johnson, J. R., Garelis, N. E., Repasy, T.,  
614 Roberts, A. W., Popov, L. M., Parry, T. J., Pratt, D., Ideker, T., Krogan, N. J., & Cox, J. S.  
615 (2020). Dynamic post-translational modification profiling of m. Tuberculosis-infected  
616 primary macrophages. *ELife*, 9. <https://doi.org/10.7554/eLife.51461>  
617 Burton, K. A., & McKnight, G. S. (2007). PKA, germ cells, and fertility. In *Physiology* (Vol. 22,

- 618 Issue 1, pp. 40–46). Physiology (Bethesda). <https://doi.org/10.1152/physiol.00034.2006>
- 619 Cancer Genome Atlas Research Network. (2017). Comprehensive and Integrative Genomic  
620 Characterization of Hepatocellular Carcinoma. *Cell*, 169(7), 1327-1341.e23.  
621 <https://doi.org/10.1016/j.cell.2017.05.046>
- 622 Cao, Y., He, M., Gao, Z., Peng, Y., Li, Y., Li, L., Zhou, W., Li, X., Zhong, X., Lei, Y., Su, T.,  
623 Wang, H., Jiang, Y., Yang, L., Wei, W., Yang, X., Jiang, X., Liu, L., He, J., ... Ning, G.  
624 (2014). Activating hotspot L205R mutation in PRKACA and adrenal Cushing's syndrome.  
625 *Science*, 344(6186), 913–917. <https://doi.org/10.1126/science.1249480>
- 626 Choi, M., Chang, C. Y., Clough, T., Broudy, D., Killeen, T., MacLean, B., & Vitek, O. (2014).  
627 MSstats: An R package for statistical analysis of quantitative mass spectrometry-based  
628 proteomic experiments. *Bioinformatics*, 30(17), 2524–2526.  
629 <https://doi.org/10.1093/bioinformatics/btu305>
- 630 Coghlan, V. M., Perrino, B. A., Howard, M., Langeberg, L. K., Hicks, J. B., Gallatin, W. M., &  
631 Scott, J. D. (1995). Association of protein kinase A and protein phosphatase 2B with a  
632 common anchoring protein. *Science*, 267(5194), 108–111.  
633 <https://doi.org/10.1126/science.7528941>
- 634 Coles, G. L., Cristea, S., Webber, J. T., Levin, R. S., Moss, S. M., He, A., Sangodkar, J., Hwang,  
635 Y. C., Arand, J., Drinas, A. P., Mooney, N. A., Demeter, J., Spradlin, J. N., Mauch, B., Le,  
636 V., Shue, Y. T., Ko, J. H., Lee, M. C., Kong, C., ... Sage, J. (2020). Unbiased Proteomic  
637 Profiling Uncovers a Targetable GNAS/PKA/PP2A Axis in Small Cell Lung Cancer Stem  
638 Cells. *Cancer Cell*, 38(1), 129-143.e7. <https://doi.org/10.1016/j.ccell.2020.05.003>
- 639 Cornella, H., Alsinet, C., Sayols, S., Zhang, Z., Hao, K., Cabellos, L., Hoshida, Y., Villanueva,  
640 A., Thung, S., Ward, S. C., Rodriguez-Carunchio, L., Vila-Casadesús, M., Imbeaud, S.,  
641 Lachenmayer, A., Quaglia, A., Nagorney, D. M., Minguez, B., Carrilho, F., Roberts, L. R.,  
642 ... Llovet, J. M. (2015). Unique genomic profile of fibrolamellar hepatocellular carcinoma.  
643 *Gastroenterology*, 148(4), 806-818.e10. <https://doi.org/10.1053/j.gastro.2014.12.028>
- 644 Cowen, L., Ideker, T., Raphael, B. J., & Sharan, R. (2017). Network propagation: A universal  
645 amplifier of genetic associations. In *Nature Reviews Genetics* (Vol. 18, Issue 9, pp. 551–  
646 562). Nature Publishing Group. <https://doi.org/10.1038/nrg.2017.38>
- 647 Dauch, D., Rudalska, R., Cossa, G., Nault, J. C., Kang, T. W., Wuestefeld, T., Hohmeyer, A.,  
648 Imbeaud, S., Yevsa, T., Hoenicke, L., Pantsar, T., Bozko, P., Malek, N. P., Longrich, T.,  
649 Laufer, S., Poso, A., Zucman-Rossi, J., Eilers, M., & Zender, L. (2016). A MYC-aurora  
650 kinase A protein complex represents an actionable drug target in p53-altered liver cancer.  
651 *Nature Medicine*, 22(7), 744–753. <https://doi.org/10.1038/nm.4107>
- 652 Dinh, T. A., Sritharan, R., Smith, F. D., Francisco, A. B., Ma, R. K., Bunaciu, R. P., Kanke, M.,  
653 Danko, C. G., Massa, A. P., Scott, J. D., & Sethupathy, P. (2020). Hotspots of Aberrant  
654 Enhancer Activity in Fibrolamellar Carcinoma Reveal Candidate Oncogenic Pathways and  
655 Therapeutic Vulnerabilities. *Cell Reports*, 31(2).  
656 <https://doi.org/10.1016/j.celrep.2020.03.073>
- 657 Dinh, T. A., Vitucci, E. C. M., Wauthier, E., Graham, R. P., Pitman, W. A., Oikawa, T., Chen,  
658 M., Silva, G. O., Greene, K. G., Torbenson, M. S., Reid, L. M., & Sethupathy, P. (2017).  
659 Comprehensive analysis of the Cancer Genome Atlas reveals a unique gene and non-coding  
660 RNA signature of fibrolamellar carcinoma. *Scientific Reports*, 7(March), 1–15.  
661 <https://doi.org/10.1038/srep44653>
- 662 Donnelly, H. J., Webber, J. T., Levin, R. S., Camarda, R., Momcilovic, O., Bayani, N., Shah, K.  
663 N., Korkola, J. E., Shokat, K. M., Goga, A., Gordan, J. D., & Bandyopadhyay, S. (2018).

- 664 Kinome rewiring reveals AURKA limits PI3K-pathway inhibitor efficacy in breast cancer.  
665 *Nature Chemical Biology*, 14(8), 768–777. <https://doi.org/10.1038/s41589-018-0081-9>
- 666 Fox, C. J., Hammerman, P. S., Cinalli, R. M., Master, S. R., Chodosh, L. A., & Thompson, C. B.  
667 (2003). The serine/threonine kinase Pim-2 is a transcriptionally regulated apoptotic  
668 inhibitor. *Genes and Development*, 17(15), 1841–1854.  
669 <https://doi.org/10.1101/gad.1105003>
- 670 Frank-Vaillant, M., Haccard, O., Thibier, C., Ozon, R., Arlot-Bonnemains, Y., Prigent, C., &  
671 Jessus, C. (2000). Progesterone regulates the accumulation and the activation of Eg2 kinase  
672 in *Xenopus* oocytes. In *Journal of Cell Science* (Vol. 113, Issue 7, pp. 1127–1138).
- 673 Franken, N. A. P., Rodermond, H. M., Stap, J., Haveman, J., & van Bree, C. (2006). Clonogenic  
674 assay of cells in vitro. *Nature Protocols*, 1(5), 2315–2319.  
675 <https://doi.org/10.1038/nprot.2006.339>
- 676 Ghandi, M., Huang, F. W., Jané-Valbuena, J., Kryukov, G. V., Lo, C. C., McDonald, E. R.,  
677 Barretina, J., Gelfand, E. T., Bielski, C. M., Li, H., Hu, K., Andreev-Drakhlin, A. Y., Kim,  
678 J., Hess, J. M., Haas, B. J., Aguet, F., Weir, B. A., Rothberg, M. V., Paolella, B. R., ...  
679 Sellers, W. R. (2019). Next-generation characterization of the Cancer Cell Line  
680 Encyclopedia. *Nature*, 569(7757), 503–508. <https://doi.org/10.1038/s41586-019-1186-3>
- 681 Graham, R. P., Lackner, C., Terracciano, L., González-Cantú, Y., Maleszewski, J. J., Greipp, P.  
682 T., Simon, S. M., & Torbenson, M. S. (2018). Fibrolamellar carcinoma in the Carney  
683 complex: PRKAR1A loss instead of the classic DNAJB1-PRKACA fusion. *Hepatology*,  
684 68(4), 1441–1447. <https://doi.org/10.1002/hep.29719>
- 685 Grieco, D., Porcellini, A., Avvedimento, E. V., & Gottesman, M. E. (1996). Requirement for  
686 cAMP-PKA pathway activation by M phase-promoting factor in the transition from mitosis  
687 to interphase. *Science*, 271(5256), 1718–1723.  
688 <https://doi.org/10.1126/science.271.5256.1718>
- 689 Gustafson, W. C., Meyerowitz, J. G., Nekritz, E. A., Chen, J., Benes, C., Charron, E., Simonds,  
690 E. F., Seeger, R., Matthay, K. K., Hertz, N. T., Eilers, M., Shokat, K. M., & Weiss, W. A.  
691 (2014). Drugging MYCN through an Allosteric Transition in Aurora Kinase A. *Cancer*  
692 *Cell*, 26(3), 414–427. <https://doi.org/10.1016/j.ccr.2014.07.015>
- 693 Hammerman, P. S., Fox, C. J., Birnbaum, M. J., & Thompson, C. B. (2005). Pim and Akt  
694 oncogenes are independent regulators of hematopoietic cell growth and survival. *Blood*,  
695 105(11), 4477–4483. <https://doi.org/10.1182/blood-2004-09-3706>
- 696 Hausken, Z. E., Dell’Acqua, M. L., Coghlan, V. M., & Scott, J. D. (1996). Mutational analysis of  
697 the A-kinase anchoring protein (AKAP)-binding site on RII: Classification of side chain  
698 determinants for anchoring and isoform selective association with AKAPs. *Journal of*  
699 *Biological Chemistry*, 271(46), 29016–29022. <https://doi.org/10.1074/jbc.271.46.29016>
- 700 Hollstein, P. E., Eichner, L. J., Brun, S. N., Kamireddy, A., Svensson, R. U., Vera, L. I., Ross, D.  
701 S., Rymoff, T. J., Hutchins, A., Galvez, H. M., Williams, A. E., Shokhirev, M. N., Sreaton,  
702 R. A., Berdeaux, R., & Shaw, R. J. (2019). The AMPK-related kinases SIK1 and SIK3  
703 mediate key tumor-suppressive effects of LKB1 in NSCLC. *Cancer Discovery*, 9(11),  
704 1606–1627. <https://doi.org/10.1158/2159-8290.CD-18-1261>
- 705 Honeyman, J. N., Simon, E. P., Robine, N., Chiaroni-Clarke, R., Darcy, D. G., Lim, I. I. P.,  
706 Gleason, C. E., Murphy, J. M., Rosenberg, B. R., Teegan, L., Takacs, C. N., Botero, S.,  
707 Belote, R., Germer, S., Emde, A. K., Vacic, V., Bhanot, U., LaQuaglia, M. P., & Simon, S.  
708 M. (2014). Detection of a recurrent DNAJB1-PRKACA chimeric transcript in fibrolamellar  
709 hepatocellular carcinoma. *Science*, 343(6174), 1010–1014.

- 710 <https://doi.org/10.1126/science.1249484>
- 711 Howe, A. K. (2004). Regulation of actin-based cell migration by cAMP/PKA. In *Biochimica et*  
712 *Biophysica Acta - Molecular Cell Research* (Vol. 1692, Issues 2–3, pp. 159–174). Biochim  
713 Biophys Acta. <https://doi.org/10.1016/j.bbamcr.2004.03.005>
- 714 Huang, J. K., Carlin, D. E., Yu, M. K., Zhang, W., Kreisberg, J. F., Tamayo, P., & Ideker, T.  
715 (2018). Systematic Evaluation of Molecular Networks for Discovery of Disease Genes. *Cell*  
716 *Systems*, 6(4), 484–495.e5. <https://doi.org/10.1016/j.cels.2018.03.001>
- 717 Huang, R., Cheung, N. V., Vider, J., Cheung, I. Y., Gerald, W. L., Tickoo, S. K., Holland, E. C.,  
718 & Blasberg, R. G. (2011). MYCN and MYC regulate tumor proliferation and tumorigenesis  
719 directly through BMI1 in human neuroblastomas. *The FASEB Journal*, 25(12), 4138–4149.  
720 <https://doi.org/10.1096/fj.11-185033>
- 721 Iglesias-Bartolome, R., Torres, D., Marone, R., Feng, X., Martin, D., Simaan, M., Chen, M.,  
722 Weinstein, L. S., Taylor, S. S., Molinolo, A. A., & Gutkind, J. S. (2015). Inactivation of a  
723  $G\alpha s$ -PKA tumour suppressor pathway in skin stem cells initiates basal-cell carcinogenesis.  
724 *Nature Cell Biology*, 17(6), 793–803. <https://doi.org/10.1038/ncb3164>
- 725 Kotani, S., Tugendreich, S., Fujii, M., Jorgensen, P. M., Watanabe, N., Hoog, C., Hieter, P., &  
726 Todokoro, K. (1998). PKA and MPF-activated polo-like kinase regulate anaphase-  
727 promoting complex activity and mitosis progression. *Molecular Cell*, 1(3), 371–380.  
728 [https://doi.org/10.1016/S1097-2765\(00\)80037-4](https://doi.org/10.1016/S1097-2765(00)80037-4)
- 729 Langeberg, L. K., & Scott, J. D. (2015). Signalling scaffolds and local organization of cellular  
730 behaviour. In *Nature Reviews Molecular Cell Biology* (Vol. 16, Issue 4, pp. 232–244).  
731 Nature Publishing Group. <https://doi.org/10.1038/nrm3966>
- 732 London, E., Bloyd, M., & Stratakis, C. A. (2020). PKA functions in metabolism and resistance to  
733 obesity: lessons from mouse and human studies. In *The Journal of endocrinology* (Vol. 246,  
734 Issue 3, pp. R51–R64). NLM (Medline). <https://doi.org/10.1530/JOE-20-0035>
- 735 McCudden, C. R., Hains, M. D., Kimple, R. J., Siderovski, D. P., & Willard, F. S. (2005). G-  
736 protein signaling: Back to the future. *Cellular and Molecular Life Sciences*, 62(5), 551–577.  
737 <https://doi.org/10.1007/s00018-004-4462-3>
- 738 McFarland, J. M., Ho, Z. V., Kugener, G., Dempster, J. M., Montgomery, P. G., Bryan, J. G.,  
739 Krill-Burger, J. M., Green, T. M., Vazquez, F., Boehm, J. S., Golub, T. R., Hahn, W. C.,  
740 Root, D. E., & Tsherniak, A. (2018). Improved estimation of cancer dependencies from  
741 large-scale RNAi screens using model-based normalization and data integration. *Nature*  
742 *Communications*, 9(1), 1–13. <https://doi.org/10.1038/s41467-018-06916-5>
- 743 Nakamura, H., Arai, Y., Totoki, Y., Shirota, T., Elzawahry, A., Kato, M., Hama, N., Hosoda, F.,  
744 Urushidate, T., Ohashi, S., Hiraoka, N., Ojima, H., Shimada, K., Okusaka, T., Kosuge, T.,  
745 Miyagawa, S., & Shibata, T. (2015). Genomic spectra of biliary tract cancer. *Nature*  
746 *Genetics*, 47(9), 1003–1010. <https://doi.org/10.1038/ng.3375>
- 747 O’Hayre, M., Vázquez-Prado, J., Kufareva, I., Stawiski, E. W., Handel, T. M., Seshagiri, S., &  
748 Gutkind, J. S. (2013). The emerging mutational landscape of G proteins and G-protein-  
749 coupled receptors in cancer. *Nature Reviews Cancer*, 13(6), 412–424.  
750 <https://doi.org/10.1038/nrc3521>
- 751 Ochoa, D., Jonikas, M., Lawrence, R. T., El Debs, B., Selkig, J., Typas, A., Villén, J., Santos, S.  
752 D., & Beltrao, P. (2016). An atlas of human kinase regulation. *Molecular Systems Biology*,  
753 12(12), 888. <https://doi.org/10.15252/msb.20167295>
- 754 Oikawa, T., Wauthier, E., Dinh, T. A., Selitsky, S. R., Reyna-Neyra, A., Carpino, G., Levine, R.,  
755 Cardinale, V., Klimstra, D., Gaudio, E., Alvaro, D., Carrasco, N., Sethupathy, P., & Reid, L.



- 756 M. (2015). Model of fibrolamellar hepatocellular carcinomas reveals striking enrichment in  
757 cancer stem cells. *Nature Communications*, 6. <https://doi.org/10.1038/ncomms9070>
- 758 Otto, T., Horn, S., Brockmann, M., Eilers, U., Schüttrumpf, L., Popov, N., Kenney, A. M.,  
759 Schulte, J. H., Beijersbergen, R., Christiansen, H., Berwanger, B., & Eilers, M. (2009).  
760 Stabilization of N-Myc Is a Critical Function of Aurora A in Human Neuroblastoma.  
761 *Cancer Cell*, 15(1), 67–78. <https://doi.org/10.1016/j.ccr.2008.12.005>
- 762 Palorini, R., Votta, G., Pirola, Y., De Vitto, H., De Palma, S., Airoidi, C., Vasso, M.,  
763 Ricciardiello, F., Lombardi, P. P., Cirulli, C., Rizzi, R., Nicotra, F., Hiller, K., Gelfi, C.,  
764 Alberghina, L., & Chiaradonna, F. (2016). Protein Kinase A Activation Promotes Cancer  
765 Cell Resistance to Glucose Starvation and Anoikis. *PLoS Genetics*, 12(3).  
766 <https://doi.org/10.1371/journal.pgen.1005931>
- 767 Pascreau, G., Delcros, J. G., Cremet, J. Y., Prigent, C., & Arlot-Bonnemains, Y. (2005).  
768 Phosphorylation of maskin by Aurora-A participates in the control of sequential protein  
769 synthesis during *Xenopus laevis* oocyte maturation. *Journal of Biological Chemistry*,  
770 280(14), 13415–13423. <https://doi.org/10.1074/jbc.M410584200>
- 771 Patra, K. C., Kato, Y., Mizukami, Y., Widholz, S., Boukhali, M., Revenco, I., Grossman, E. A.,  
772 Ji, F., Sadreyev, R. I., Liss, A. S., Sreaton, R. A., Sakamoto, K., Ryan, D. P., Mino-  
773 Kenudson, M., Castillo, C. F. Del, Nomura, D. K., Haas, W., & Bardeesy, N. (2018).  
774 Mutant GNAS drives pancreatic tumorigenesis by inducing PKA-mediated SIK  
775 suppression and reprogramming lipid metabolism. *Nature Cell Biology*, 20(7), 811–822.  
776 <https://doi.org/10.1038/s41556-018-0122-3>
- 777 Richards, M. W., Burgess, S. G., Poon, E., Carstensen, A., Eilers, M., Chesler, L., & Bayliss, R.  
778 (2016). Structural basis of N-Myc binding by Aurora-A and its destabilization by kinase  
779 inhibitors. *Proceedings of the National Academy of Sciences of the United States of*  
780 *America*, 113(48), 13726–13731. <https://doi.org/10.1073/pnas.1610626113>
- 781 Salpea, P., & Stratakis, C. A. (2014). Carney complex and McCune Albright syndrome: An  
782 overview of clinical manifestations and human molecular genetics. In *Molecular and*  
783 *Cellular Endocrinology* (Vol. 386, Issues 1–2, pp. 85–91). NIH Public Access.  
784 <https://doi.org/10.1016/j.mce.2013.08.022>
- 785 Schilling, B., Rardin, M. J., MacLean, B. X., Zawadzka, A. M., Frewen, B. E., Cusack, M. P.,  
786 Sorensen, D. J., Bereman, M. S., Jing, E., Wu, C. C., Verdin, E., Kahn, C. R., MacCoss, M.  
787 J., & Gibson, B. W. (2012). Platform-independent and label-free quantitation of proteomic  
788 data using MS1 extracted ion chromatograms in skyline: Application to protein acetylation  
789 and phosphorylation. *Molecular and Cellular Proteomics*, 11(5), 202–214.  
790 <https://doi.org/10.1074/mcp.M112.017707>
- 791 Scott, J. D., & Pawson, T. (2009). Cell signaling in space and time: Where proteins come  
792 together and when they're apart. In *Science* (Vol. 326, Issue 5957, pp. 1220–1224).  
793 American Association for the Advancement of Science.  
794 <https://doi.org/10.1126/science.1175668>
- 795 Shannon, P., Markiel, A., Ozier, O., Baliga, N. S., Wang, J. T., Ramage, D., Amin, N.,  
796 Schwikowski, B., & Ideker, T. (2003). Cytoscape: A software Environment for integrated  
797 models of biomolecular interaction networks. *Genome Research*, 13(11), 2498–2504.  
798 <https://doi.org/10.1101/gr.1239303>
- 799 Simon, E. P., Freije, C. A., Farber, B. A., Lalazar, G., Darcy, D. G., Honeyman, J. N., Chiaroni-  
800 Clarke, R., Dill, B. D., Molina, H., Bhanot, U. K., La Quaglia, M. P., Rosenberg, B. R., &  
801 Simon, S. M. (2015). Transcriptomic characterization of fibrolamellar hepatocellular

- 802 carcinoma. *Proceedings of the National Academy of Sciences of the United States of*  
803 *America*, 112(44), E5916–E5925. <https://doi.org/10.1073/pnas.1424894112>
- 804 Singhi, A. D., Wood, L. D., Parks, E., Torbenson, M. S., Felsenstein, M., Hruban, R. H.,  
805 Nikiforova, M. N., Wald, A. I., Kaya, C., Nikiforov, Y. E., Favazza, L., He, J., McGrath,  
806 K., Fasanella, K. E., Brand, R. E., Lennon, A. M., Furlan, A., Dasyam, A. K., Zureikat, A.  
807 H., ... Slivka, A. (2020). Recurrent Rearrangements in PRKACA and PRKACB in  
808 Intraductal Oncocytic Papillary Neoplasms of the Pancreas and Bile Duct.  
809 *Gastroenterology*, 158(3), 573–582.e2. <https://doi.org/10.1053/j.gastro.2019.10.028>
- 810 Skålhegg, B. S., Huang, Y., Su, T., Idzerda, R. L., McKnight, G. S., & Burton, K. A. (2002).  
811 Mutation of the C $\alpha$  Subunit of PKA Leads to Growth Retardation and Sperm Dysfunction.  
812 *Molecular Endocrinology*, 16(3), 630–639. <https://doi.org/10.1210/mend.16.3.0793>
- 813 Smith, F. D., Esseltine, J. L., Nygren, P. J., Veessler, D., Byrne, D. P., Vonderach, M., Strashnov,  
814 I., Evers, C. E., Evers, P. A., Langeberg, L. K., & Scott, J. D. (2017). Local protein kinase  
815 A action proceeds through intact holoenzymes. *Science*, 356(6344), 1288–1293.  
816 <https://doi.org/10.1126/science.aaj1669>
- 817 Smith, F. D., Langeberg, L. K., Cellurale, C., Pawson, T., Morrison, D. K., Davis, R. J., & Scott,  
818 J. D. (2010). AKAP-Lbc enhances cyclic AMP control of the ERK1/2 cascade. *Nature Cell*  
819 *Biology*, 12(12), 1242–1249. <https://doi.org/10.1038/ncb2130>
- 820 Solc, P., Schultz, R. M., & Motlik, J. (2010). Prophase I arrest and progression to metaphase I in  
821 mouse oocytes: Comparison of resumption of meiosis and recovery from G2-arrest in  
822 somatic cells. In *Molecular Human Reproduction* (Vol. 16, Issue 9, pp. 654–664). Mol Hum  
823 Reprod. <https://doi.org/10.1093/molehr/gaq034>
- 824 Sos, M. L., Levin, R. S., Gordan, J. D., Oses-Prieto, J. A., Webber, J. T., Salt, M., Hann, B.,  
825 Burlingame, A. L., McCormick, F., Bandyopadhyay, S., & Shokat, K. M. (2014). Oncogene  
826 mimicry as a mechanism of primary resistance to BRAF inhibitors. *Cell Reports*, 8(4),  
827 1037–1048. <https://doi.org/10.1016/j.celrep.2014.07.010>
- 828 Taylor, S. S., Zhang, P., Steichen, J. M., Keshwani, M. M., & Kornev, A. P. (2013). PKA:  
829 Lessons learned after twenty years. *Biochimica et Biophysica Acta (BBA) - Proteins and*  
830 *Proteomics*, 1834(7), 1271–1278. <https://doi.org/10.1016/j.bbapap.2013.03.007>
- 831 Tokita, M. J., Nahas, S., Briggs, B., Malicki, D. M., Mesirov, J. P., Reyes, I. A. C., Farnaes, L.,  
832 Levy, M. L., Kingsmore, S. F., Dimmock, D., Crawford, J. R., & Wechsler-Reya, R. J.  
833 (2019). Biallelic loss of GNAS in a patient with pediatric medulloblastoma. *Cold Spring*  
834 *Harbor Molecular Case Studies*, 5(5). <https://doi.org/10.1101/mcs.a004572>
- 835 Turnham, R. E., & Scott, J. D. (2016). Protein kinase A catalytic subunit isoform PRKACA;  
836 History, function and physiology. In *Gene* (Vol. 577, Issue 2, pp. 101–108). Elsevier B.V.  
837 <https://doi.org/10.1016/j.gene.2015.11.052>
- 838 Turnham, R. E., Smith, F. D., Kenerson, H. L., Omar, M. H., Golkowski, M., Garcia, I., Bauer,  
839 R., Lau, H. T., Sullivan, K. M., Langeberg, L. K., Ong, S. E., Riehle, K. J., Yeung, R. S., &  
840 Scott, J. D. (2019). An acquired scaffolding function of the dnaj-pkac fusion contributes to  
841 oncogenic signaling in fibrolamellar carcinoma. *ELife*, 8, 1–27.  
842 <https://doi.org/10.7554/eLife.44187>
- 843 Tyanova, S., Temu, T., & Cox, J. (2016). The MaxQuant computational platform for mass  
844 spectrometry-based shotgun proteomics. *Nature Protocols*, 11(12), 2301–2319.  
845 <https://doi.org/10.1038/nprot.2016.136>
- 846 Untergasser, A., Cutcutache, I., Koressaar, T., Ye, J., Faircloth, B. C., Remm, M., & Rozen, S.  
847 G. (2012). Primer3-new capabilities and interfaces. *Nucleic Acids Research*, 40(15), e115.

- 848 <https://doi.org/10.1093/nar/gks596>
- 849 Viste, K., Kopperud, R. K., Christensen, A. E., & Døskeland, S. O. (2005). Substrate enhances  
850 the sensitivity of type I protein kinase a to cAMP. *Journal of Biological Chemistry*,  
851 *280*(14), 13279–13284. <https://doi.org/10.1074/jbc.M413065200>
- 852 Weinstein, J. N., Collisson, E. A., Mills, G. B., Shaw, K. R. M., Ozenberger, B. A., Ellrott, K.,  
853 Sander, C., Stuart, J. M., Chang, K., Creighton, C. J., Davis, C., Donehower, L.,  
854 Drummond, J., Wheeler, D., Ally, A., Balasundaram, M., Birol, I., Butterfield, Y. S. N.,  
855 Chu, A., ... Kling, T. (2013). The cancer genome atlas pan-cancer analysis project. In  
856 *Nature Genetics* (Vol. 45, Issue 10, pp. 1113–1120). Nature Publishing Group.  
857 <https://doi.org/10.1038/ng.2764>
- 858 Willis, B. S., Niswender, C. M., Su, T., Amieux, P. S., & McKnight, G. S. (2011). Cell-type  
859 specific expression of a dominant negative PKA mutation in mice. *PLoS ONE*, *6*(4).  
860 <https://doi.org/10.1371/journal.pone.0018772>
- 861 Wu, G., & Haw, R. (2017). Functional interaction network construction and analysis for disease  
862 discovery. In *Methods in Molecular Biology* (Vol. 1558, pp. 235–253). Humana Press Inc.  
863 [https://doi.org/10.1007/978-1-4939-6783-4\\_11](https://doi.org/10.1007/978-1-4939-6783-4_11)
- 864 Yin, Z., Pringle, D. R., Jones, G. N., Kelly, K. M., & Kirschner, L. S. (2011). Differential role of  
865 PKA catalytic subunits in mediating phenotypes caused by knockout of the Carney complex  
866 gene *Prkar1a*. *Molecular Endocrinology*, *25*(10), 1786–1793.  
867 <https://doi.org/10.1210/me.2011-1008>
- 868 Zhang, Y., Wang, Z., Li, X., & Magnuson, N. S. (2008). Pim kinase-dependent inhibition of c-  
869 Myc degradation. *Oncogene*, *27*(35), 4809–4819. <https://doi.org/10.1038/onc.2008.123>
- 870
- 871

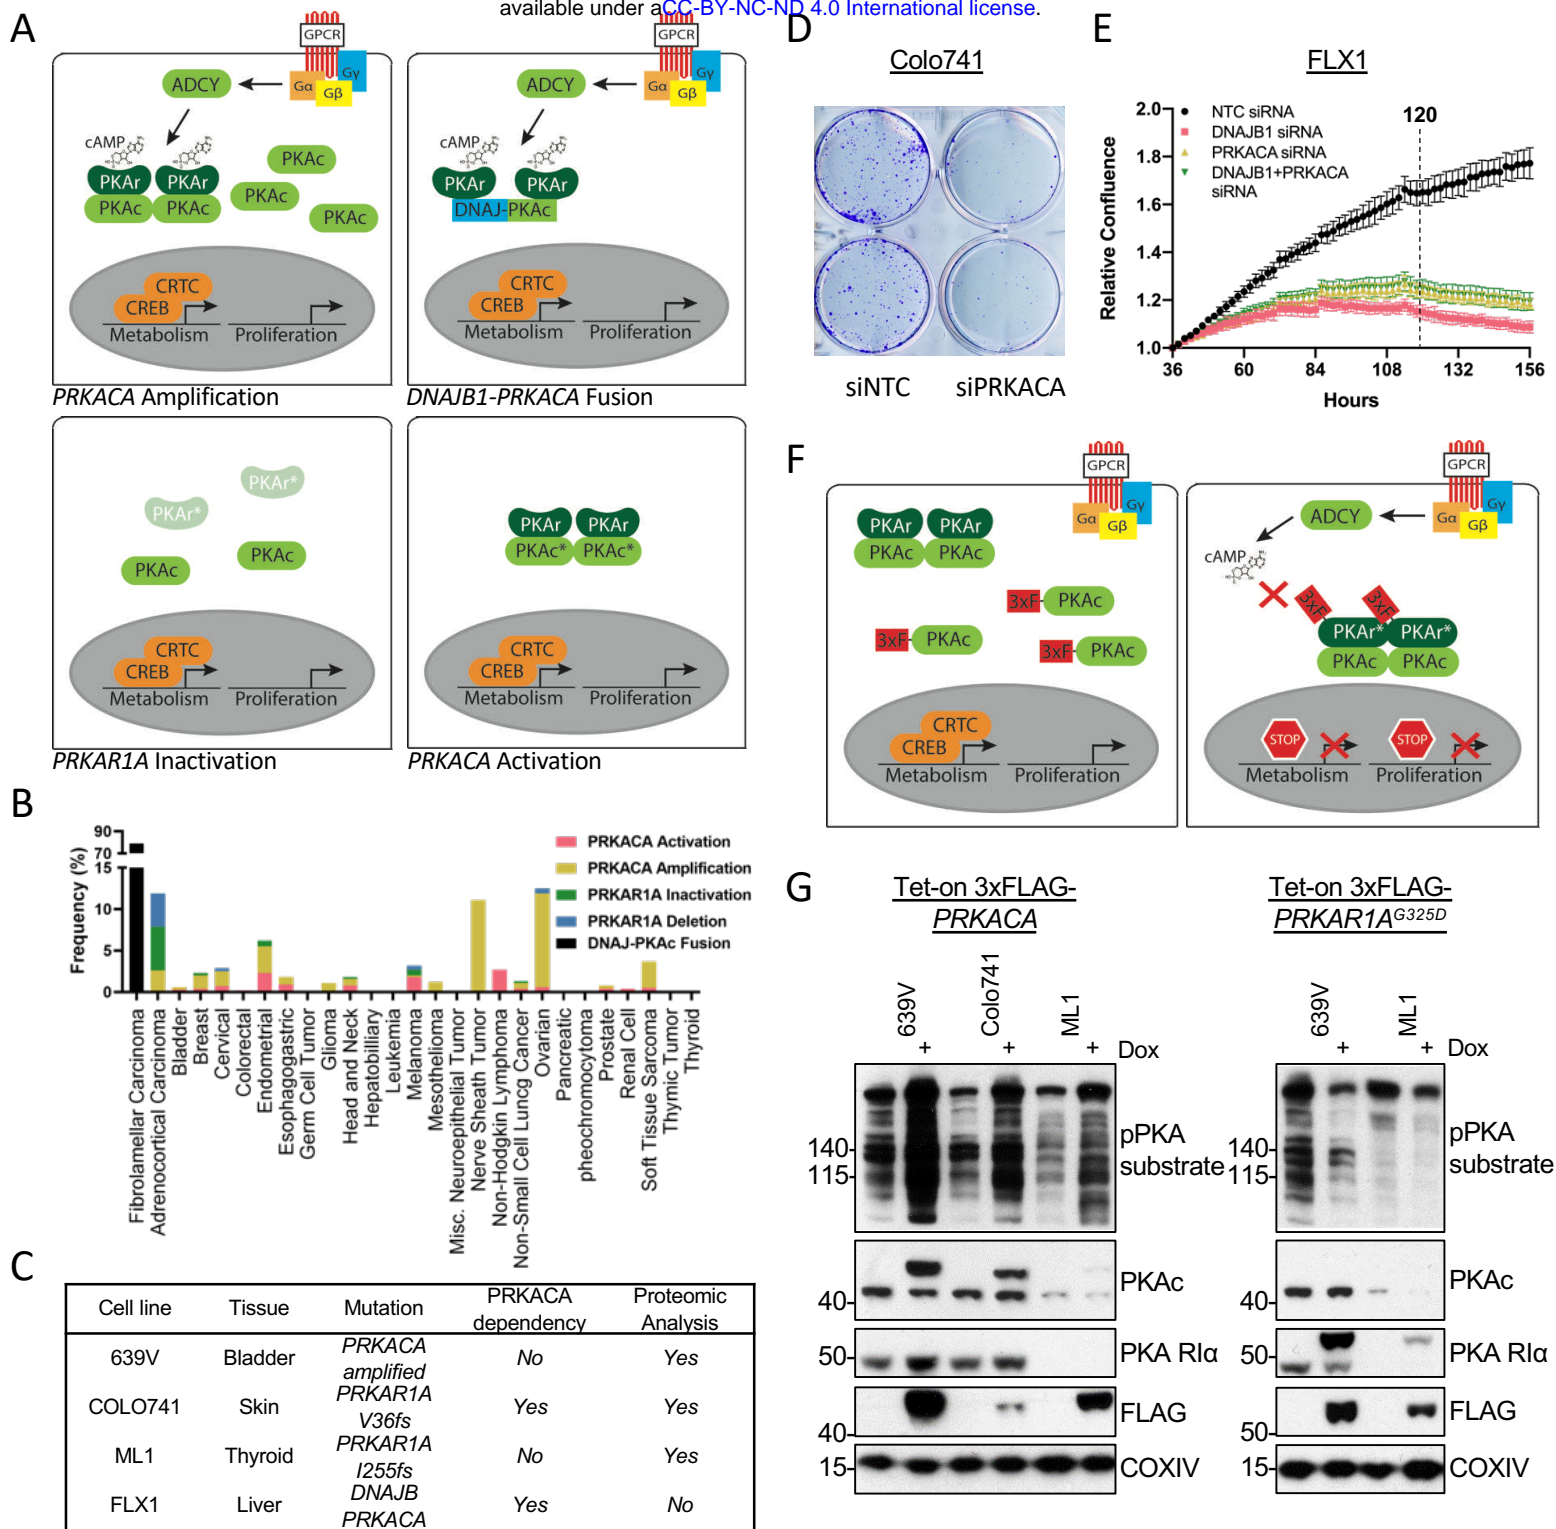

**Figure 1. Recurrent PKA activating somatic alterations in human cancer.** (A) Pathway illustrations of different PKA activating genomic alterations. Top left: *PRKACA* amplification. Top right: *DNAJB1-PRKACA* fusion. Bottom left: *PRKAR1A* inactivation or deletion. Bottom right: *PRKACA* activation. (B) TCGA PanCancer Project analysis shows the frequency of *PRKACA* gain-of-function (red and yellow) and *PRKAR1A* loss-of-function (green and blue) alterations in various cancer types. The reported frequency of *DNAJB1-PRKACA* fusion in FLC clinical samples is also included. (C) Cell lines used in this study, their PKA related mutation, *PRKACA* dependency and inclusion in proteomic analyses. (D) Clonogenic assay of Colo741 cells treated with NTC (left) or *PRKACA* (right) siRNA. Experiments were done twice with different cell density, and two of the three technical replications from the best representation were shown. (E) Relative confluence of FLX1 cells in 96 wells plate treated with NTC, *DNAJB1*, *PRKACA* or a mixture (50:50) of *DNAJB1* and *PRKACA* siRNA. 120 hours is marked with the dashed line. Result was the mean  $\pm$  s.d. of one biological replicate, n = 15 for each condition. (F) Schematic of doxycycline-induced PKAc modulating system. Left: Tet-on 3xFLAG-*PRKACA*. Right: Tet-on 3xFLAG-*PRKAR1A*<sup>G325D</sup>. (G) Immunoblots showing the change of PKA activity, as indicated by phospho-PKA substrate, in different cell lines with dox-inducible 3xFLAG-*PRKACA* or *PRKAR1A*<sup>G325D</sup> with 1  $\mu$ g/ml doxycycline (dox) for 48 hours. Left: transgenic cell lines with Tet-on 3xFLAG-*PRKACA*. Right: transgenic cell lines with Tet-on 3xFLAG-*PRKAR1A*<sup>G325D</sup>.



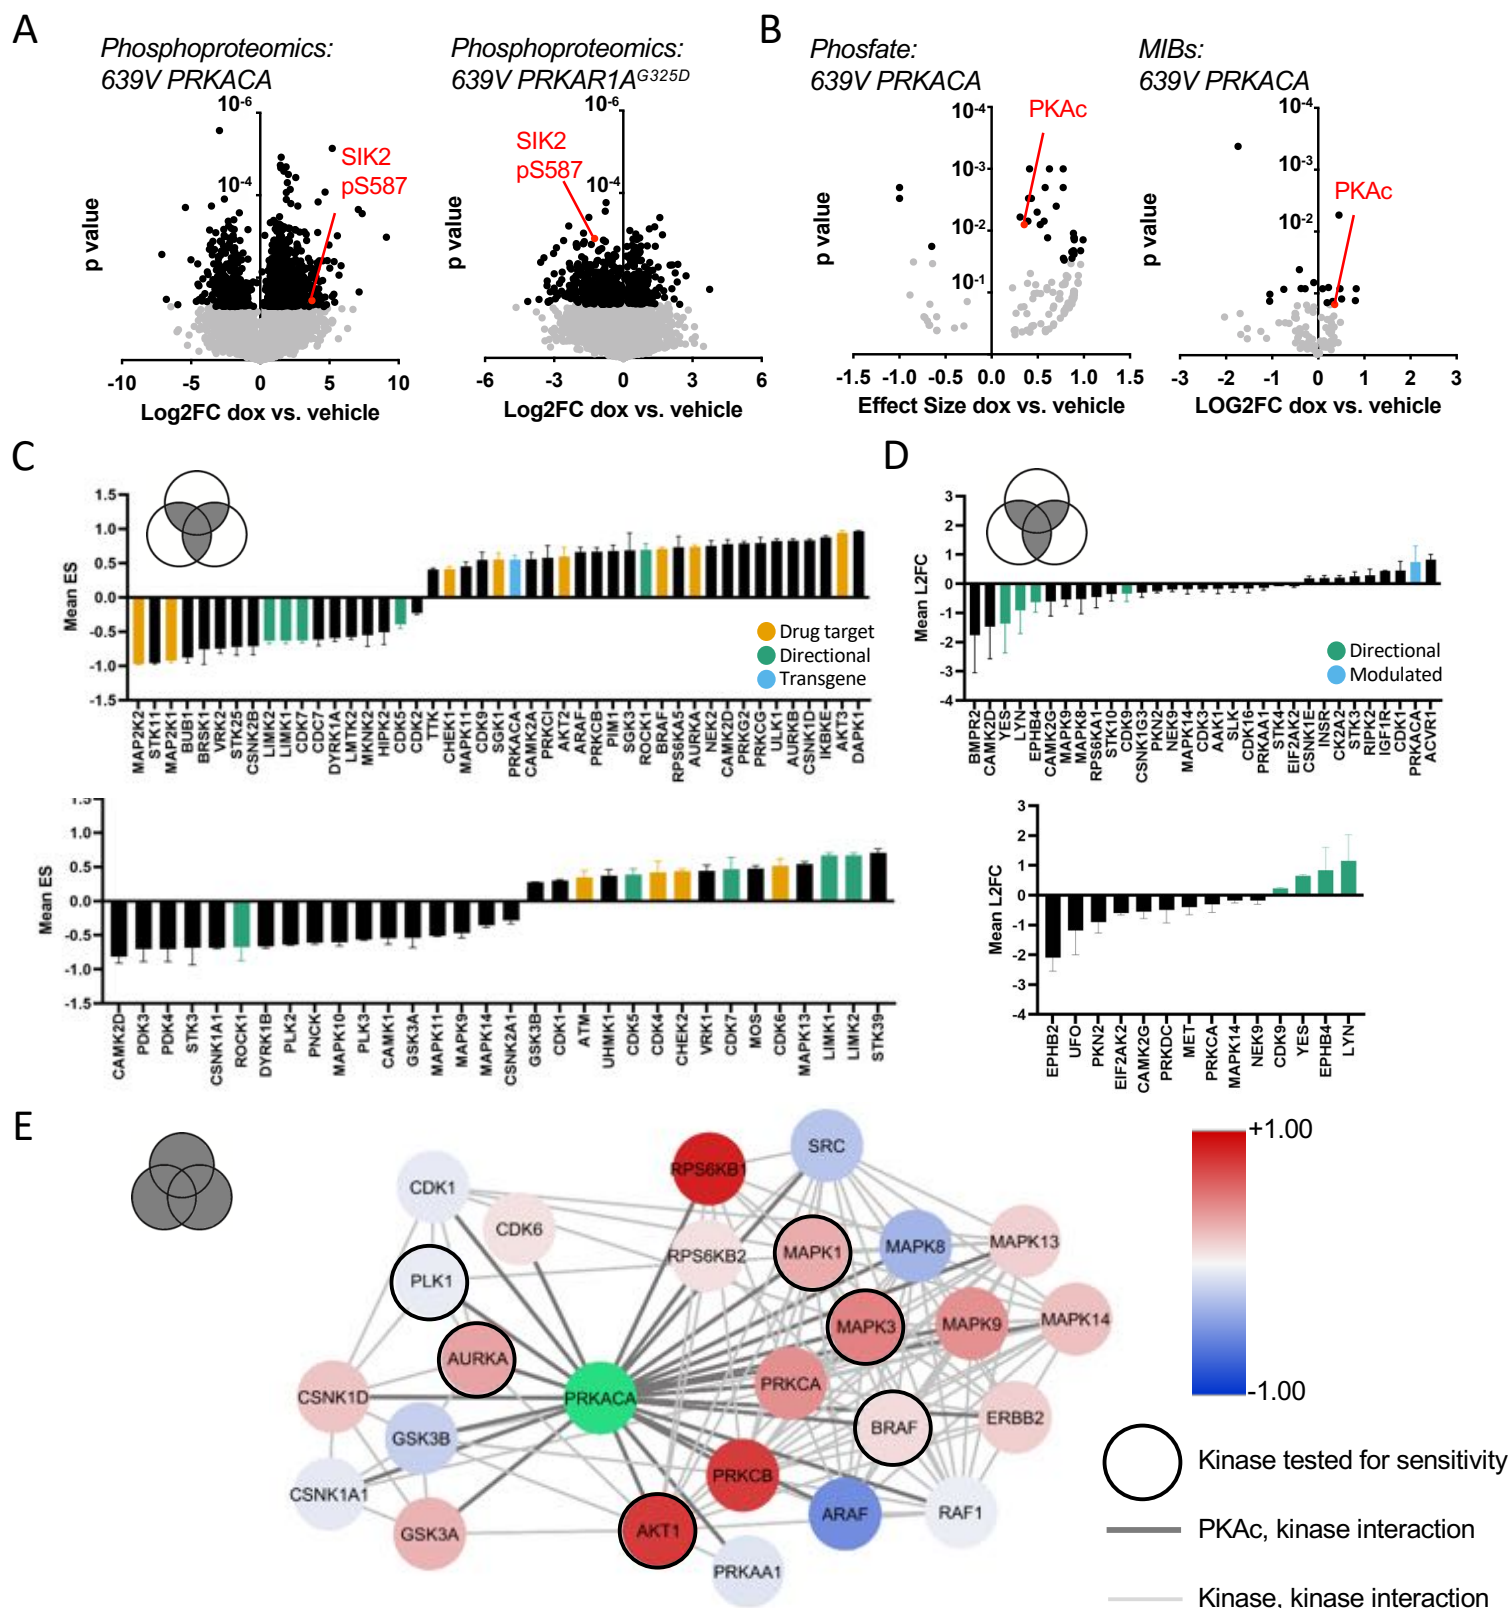

**Figure 2. Kinome profiling to identify signaling nodes downstream of *PRKACA*.** (A) Global phosphorylation change based on combined analysis of Phosphate and MIBs using 639V with *PRKACA* or *PRKAR1A*<sup>G325D</sup> induced. (B) Change in kinase activity based on Phosphate analysis or MIBs pipeline using 639V Tet-on 3xFLAG-*PRKACA* compared to control. (C) In intersect, inferred kinase activity changes based on global phosphoproteomics using the Phosphate analysis tool averaged across different transgenic cell lines, with versus without dox induction. (top) 639V, Colo741, and ML1 cells with Tet-on 3xFLAG-*PRKACA*. (Bottom) 639V and ML1 with Tet-on 3xFLAG-*PRKAR1A*<sup>G325D</sup>. (D) In intersect, kinase activity changes based on MIBs averaged across different transgenic cell lines, with versus without dox induction. (top) 639V, Colo741, and ML1 cells with Tet-on 3xFLAG-*PRKACA*. (Bottom) 639V and ML1 with Tet-on 3xFLAG-*PRKAR1A*<sup>G325D</sup>. (E) MIBs and Phosphate kinome profiles from 639V, Colo741 and ML1 with Tet-on 3xFLAG-*PRKACA* and 639V and ML1 with Tet-on 3xFLAG-*PRKAR1A*<sup>G325D</sup> were integrated by network propagation. Each node was filled to represent the original z-scores of kinase activity, which were averaged across cell lines.

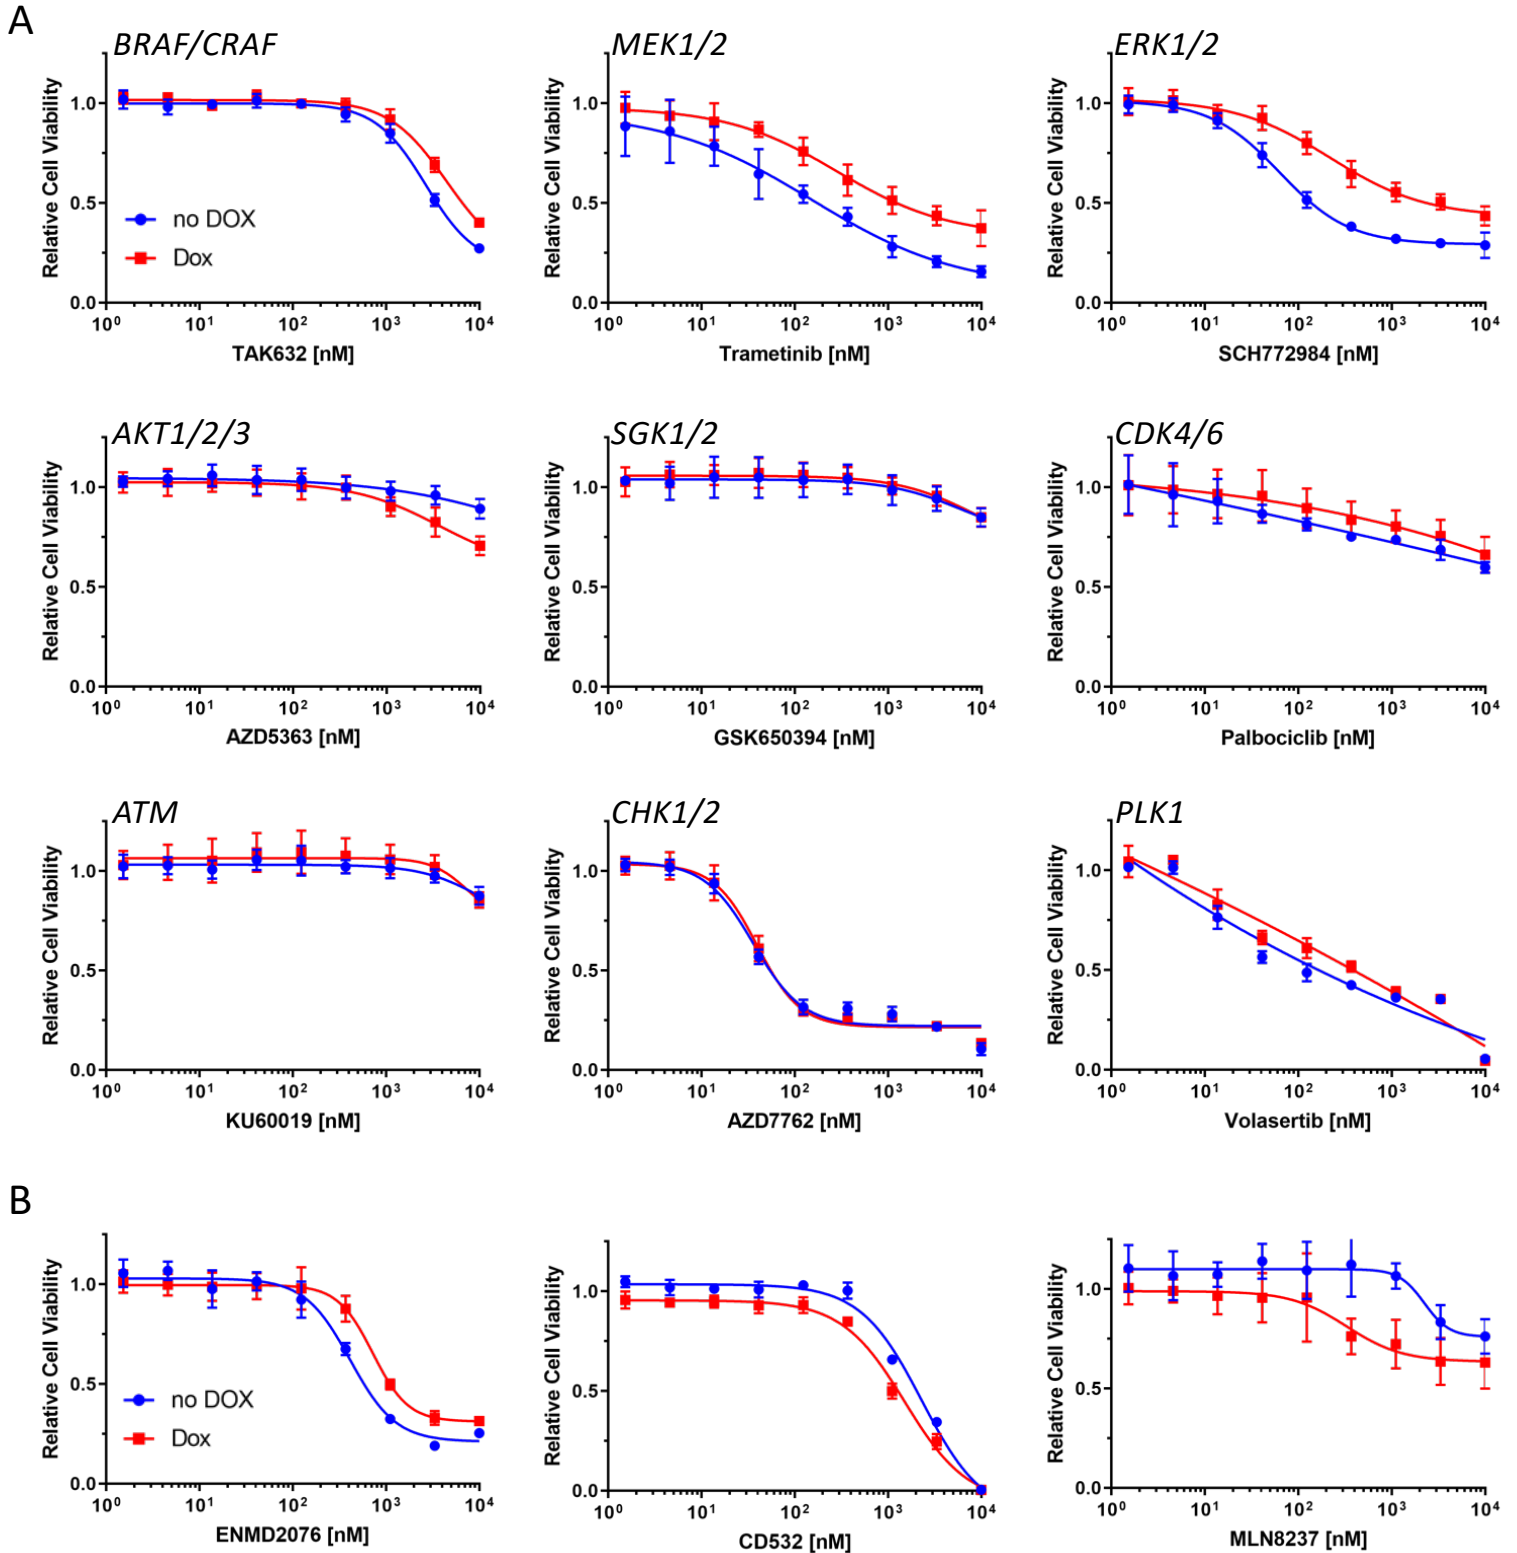

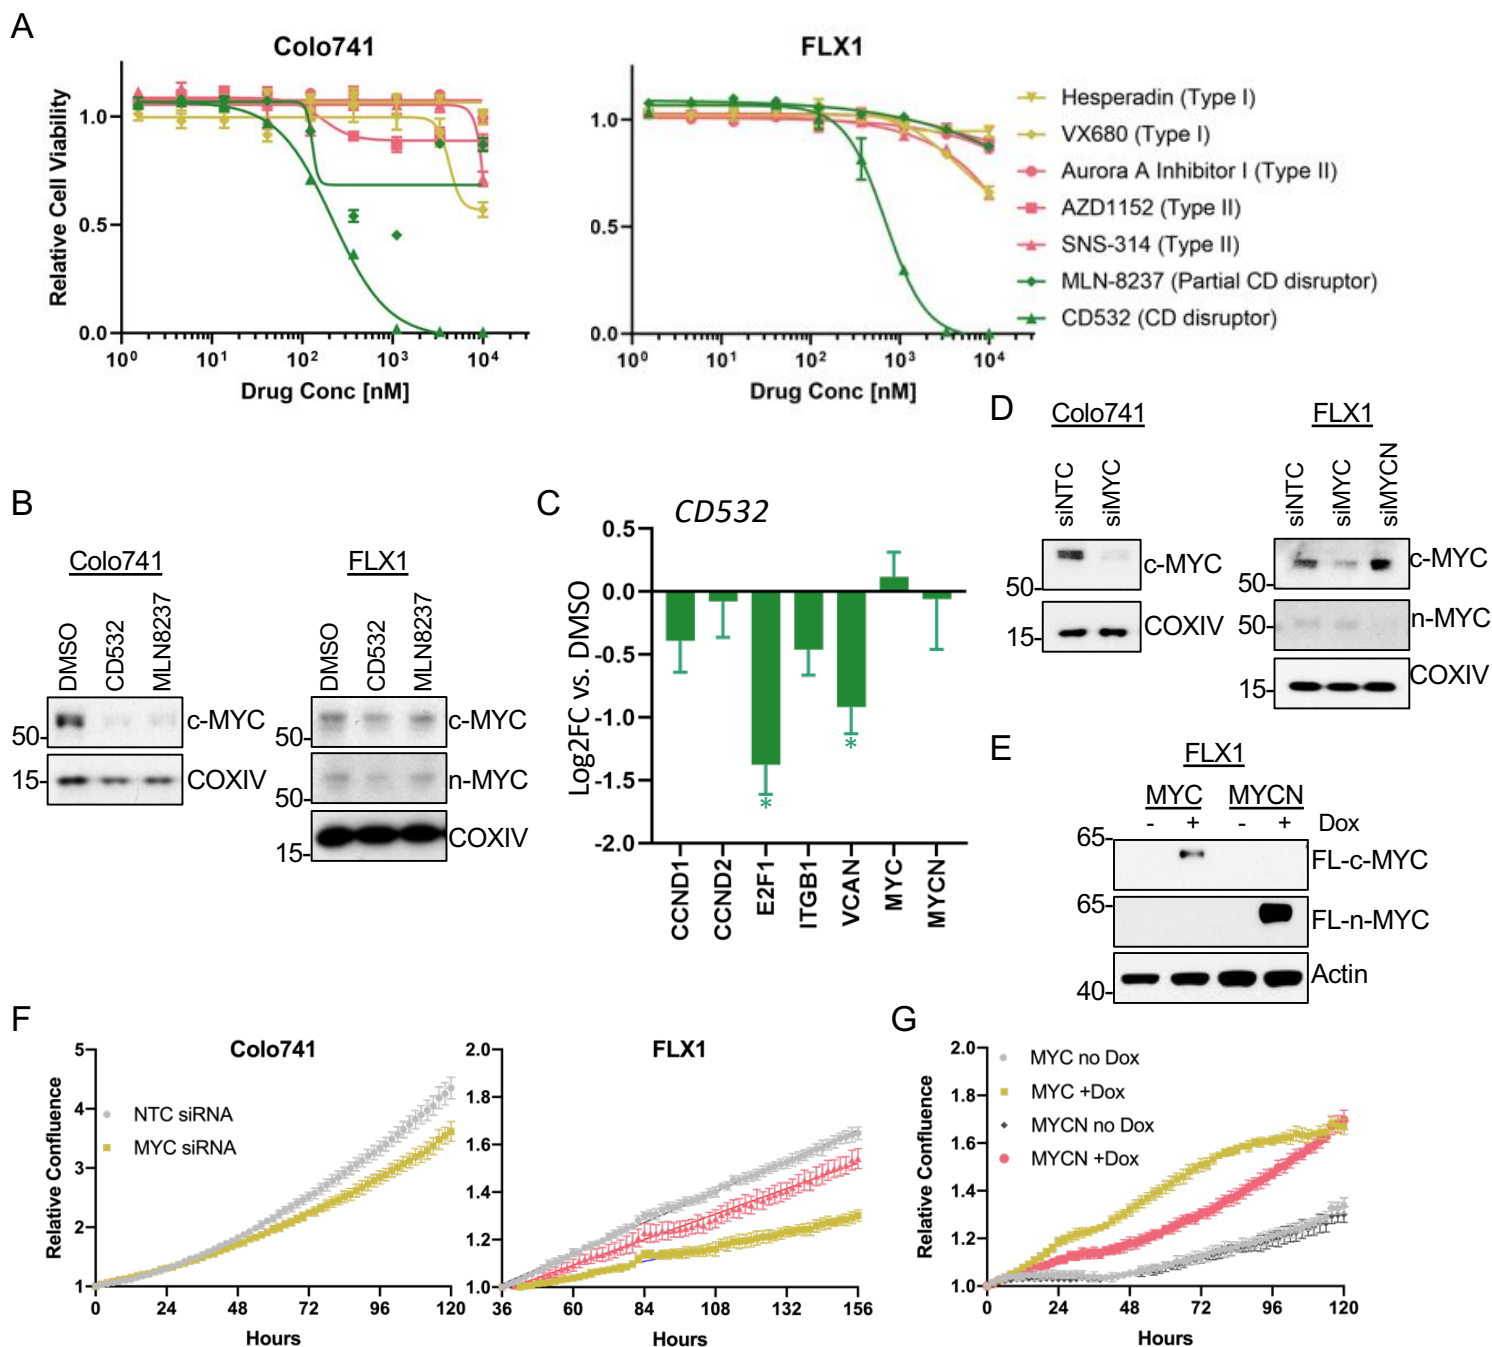

**Figure 3. c-MYC and n-MYC promote proliferation of PKA-dependent cell models.** (A) Colo741 and FLX1 cells in 96-well plates were treated with various types of AURKA inhibitors for 72h at different concentrations, and their relative cell viability was measured by CTG assay versus untreated control samples. Results are the mean  $\pm$  s.e.m of triple biological replicates, three technical replicates per biological replicate. Inhibitors are colored based on their binding mode. (B) Immunoblots showing the expression of c-MYC and n-MYC in Colo741 and FLX1 cells after treating with CD532 or MLN8237 for 24 hours. (C) RT-qPCR analysis of *MYC*, *MYCN* and their downstream genes in FLX1 cells treated with 1 $\mu$ M CD532 for 24 hours. Results are the mean  $\pm$  s.e.m of three biological replicates, three technical replicates for each biological replicate, targets with P value <0.05 from paired t-test for CD532 treated versus DMSO were labelled with the asterisk. (D) Immunoblots showing the change of c-MYC and n-MYC levels in Colo741 and FLX1 cells after *MYC* or *MYCN* siRNA knockdown for 48 hours. (E) Immunoblots showing the induction of Tet-on 3xFLAG-*MYC* and *MYCN* in respective FLX1 transgenic cells after dox induction for 48 hours. (F) Relative confluence of Colo741 and FLX1 cells in 96 well plates after *MYC* or *MYCN* knockdown with siRNA. FLX1 cells were incubated 36 hours before recording to ensure better adhesion. Experiments were done in duplicate and representative results were shown with mean  $\pm$  s.d, n = 10 for each condition. (G) Relative confluence of transgenic FLX1 cells with doxycycline-controlled Tet-on 3xFLAG-*MYC* or *MYCN* in 96 well plates after treatment with or without 1 $\mu$ g/ml dox. Confluence was imaged for 120 hours and analyzed by Incucyte. Experiment was duplicate, the representative results shown with mean  $\pm$  s.d, n = 6 for each condition.

| qRT-PCR Primers |                       |
|-----------------|-----------------------|
| Name            | Sequence              |
| 18S_F           | GTGGAGCGATTTGTCTGGTT  |
| 18S_R           | CGCTGAGCCAGTCAGTGTAG  |
| CCND1_F         | ATCAAGTGTGACCCGGACTG  |
| CCND1_R         | CTTGGGGTCCATGTTCTGCT  |
| CCND2_F         | TGGGGAAGTTGAAGTGG AAC |
| CCND2_R         | ATCATCGACGGTGGGTACAT  |
| E2F1_F          | CTTCGTAGCATTGCAGACCC  |
| E2F1_R          | TATGGTGGCAGAGTCAGTGG  |
| ITGB1_F         | TGGCCTTGCATTACTGCTGA  |
| ITGB1_R         | CGGATTTTCTTGC GTGCC   |
| MYC_F           | CCTACCCTCTCAACGACAGC  |
| MYC_R           | CTTGTTCTCCTCAGAGTCGC  |
| MYCN_F          | CAGTCGGCGGGAGTGTTG    |
| MYCN_R          | CTCGAGGTCTGGGTTCTTGC  |
| VCAN_F          | CAAGCTGCTGGCAAGTGATG  |
| VCAN_R          | CACAACCCCATCCACAGTCA  |

**S. Table 1. List of primers for qRT-PCR.**



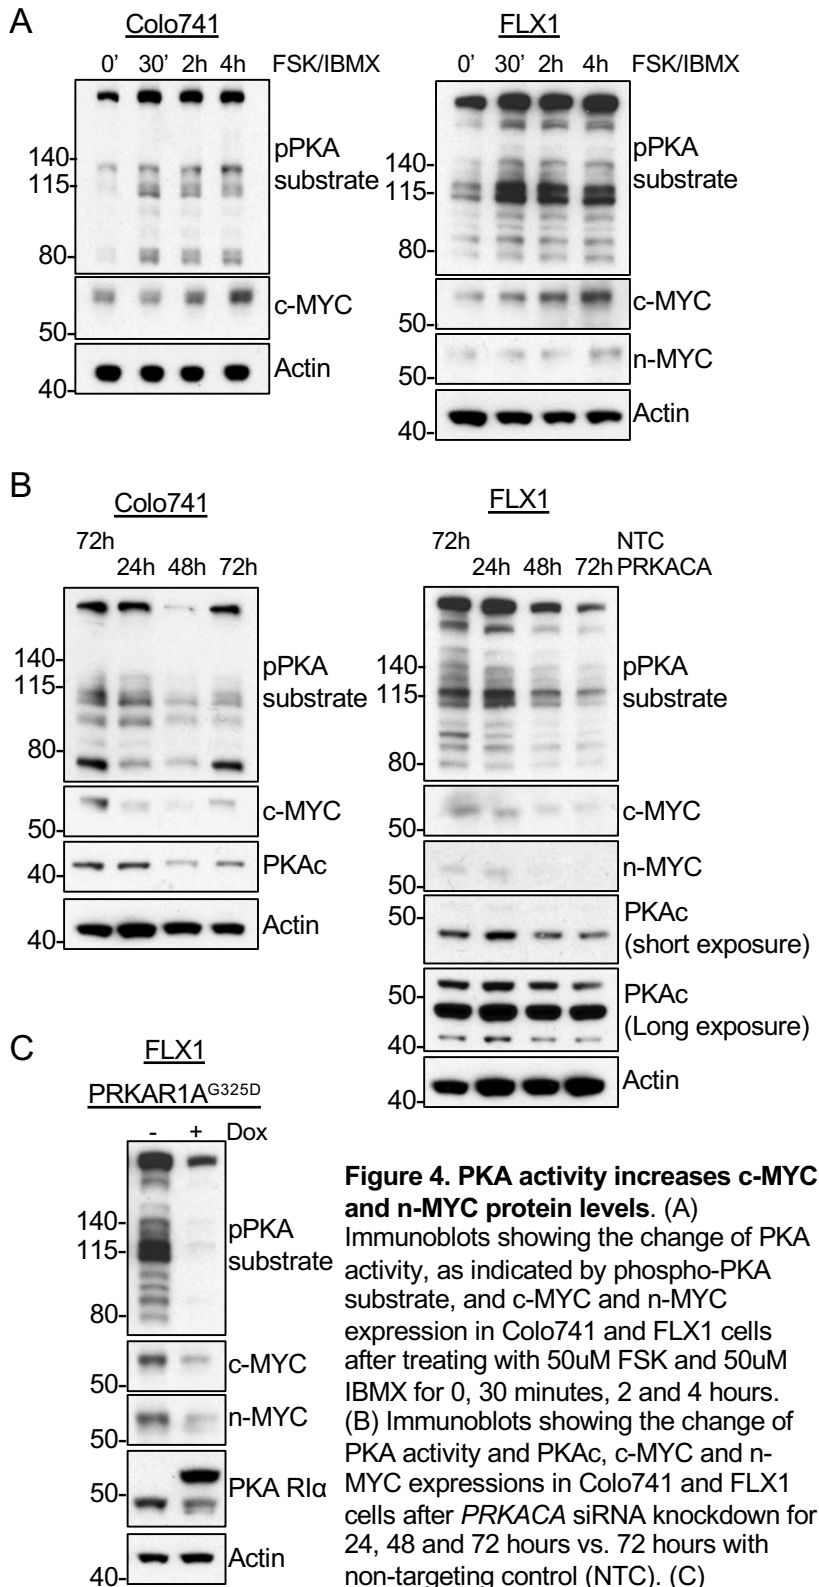

**Figure 4. PKA activity increases c-MYC and n-MYC protein levels.** (A) Immunoblots showing the change of PKA activity, as indicated by phospho-PKA substrate, and c-MYC and n-MYC expression in Colo741 and FLX1 cells after treating with 50uM FSK and 50uM IBMX for 0, 30 minutes, 2 and 4 hours. (B) Immunoblots showing the change of PKA activity and PKAc, c-MYC and n-MYC expressions in Colo741 and FLX1 cells after *PRKACA* siRNA knockdown for 24, 48 and 72 hours vs. 72 hours with non-targeting control (NTC). (C) Immunoblots showing the change of PKA activity and c-MYC and n-MYC levels in transgenic FLX1 cells with Tet-on 3xFLAG-*PRKAR1A<sup>G325D</sup>* with or without dox for 72 hours.

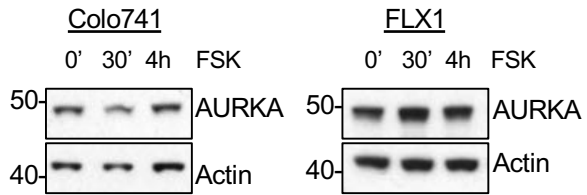

**S. Figure 2. PKA activity has little effect on AURKA protein level.** Immunoblots showing the AURKA expression in Colo741 and FLX1 cells after treating with 50uM FSK for 0, 30 minutes, and 4 hours.

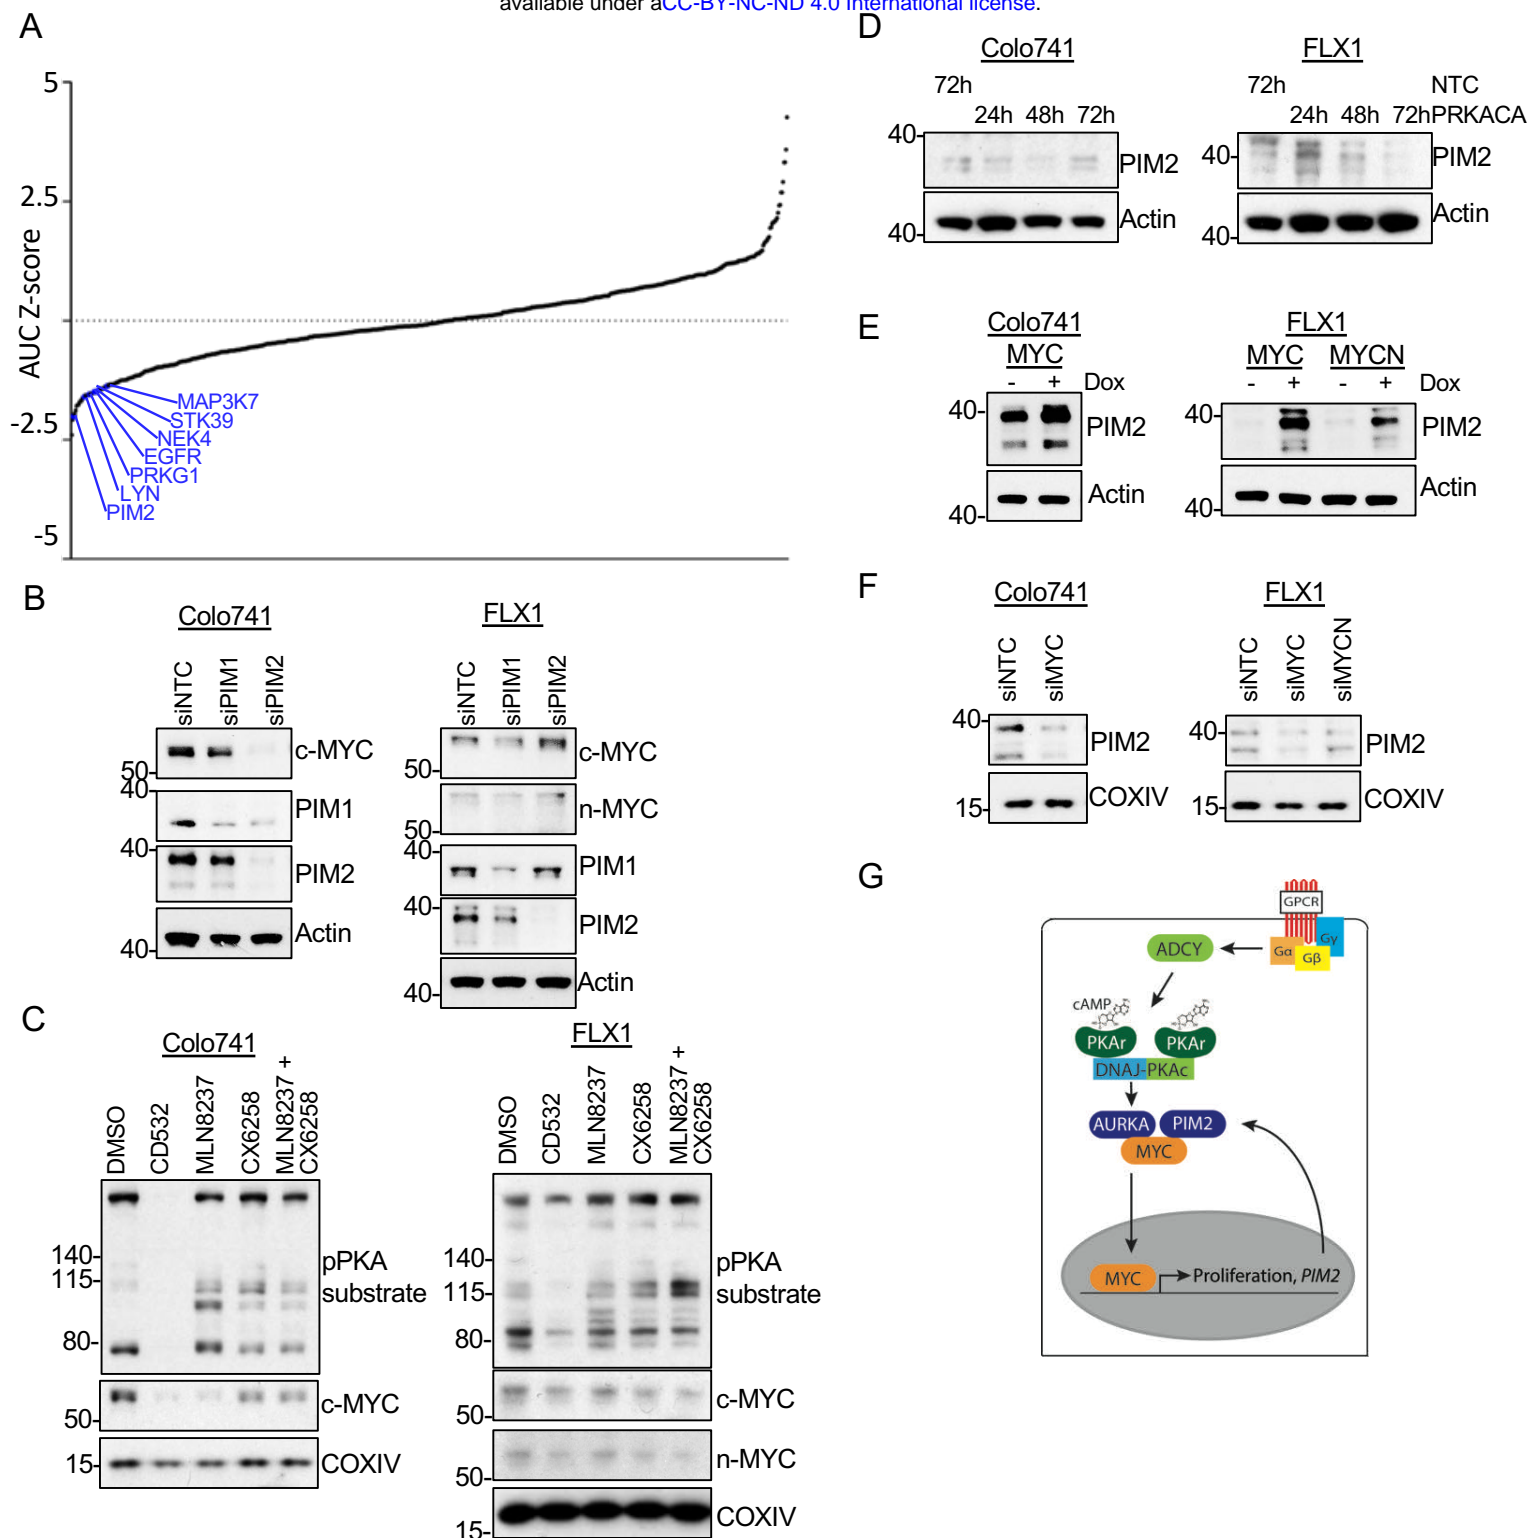

**Figure 5. PIM2 increases c-MYC /n-MYC expression in cooperation with AURKA.** (A) siRNA kinase library screen with FLX1 in 384 well plates for 7 days shows the effect of each target kinase on cell proliferation (average of 3 biological replicates). Selected non-metabolic kinases that decrease cell proliferation with z-score < -1 were marked. (B) Immunoblots showing the change of c-MYC and n-MYC levels in Colo741 and FLX1 cells after *PIM1* or *PIM2* siRNA knockdown for 48 hours. (C) Immunoblot showing the change of PKA activity, as indicated by phospho-PKA substrate, and c-MYC and n-MYC levels in Colo741 and FLX1 cells after treating with DMSO, 1uM CD532, 1uM MLN8237, 1uM CX6258 or combination of 1uM MLN8237 and 1uM CX6258 for 24 hours. (D) Immunoblots showing the change of PIM2 expression in Colo741 and FLX1 cells after *PRKACA* siRNA knockdown for 24, 48 and 72 hours and NTC for 72 hours. (E) Immunoblots showing the change of PIM2 level after *MYC* or *MYCN* overexpression in Colo741 or FLX1 transgenic cells after dox induction for 48 hours. (F) Immunoblots showing the change of PIM2 levels in Colo741 and FLX1 cells after *MYC* or *MYCN* siRNA knockdown for 48 hours. (G) Schematic of DNAJ-PKAc mediating cell proliferation in FLC by stabilizing MYC family proteins via AURKA and producing a positive feedback loop with PIM2.

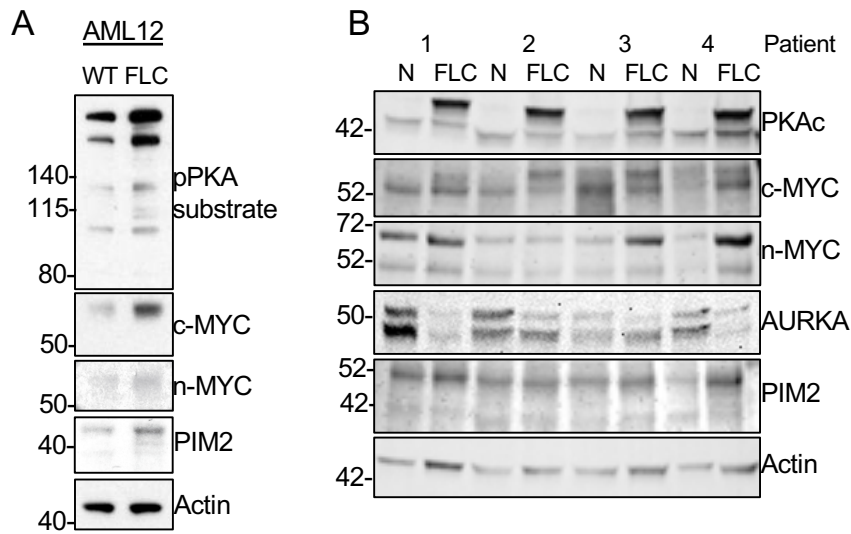

**Figure 6. Higher c-MYC and n-MYC protein levels are found in human FLC tumor samples.** (A) Immunoblots showing the basal level of PKA activity in phosphorylated PKA substrate and c-MYC, n-MYC, and PIM2 in AML12 WT (left) and AML12<sup>DNAJ-PKAc</sup> cells (right). (B) Immunoblot showing the presence of DNAJ-PKAc and different level of c-MYC, n-MYC, AURKA and PIM2 in FLC tumor samples (FLC) versus adjacent liver (N) from 4 FLC patients.
